RESEARCH ARTICLE

# Transcriptomic and Proteomic Analyses of Resistant Host Responses in *Arachis diogeni* Challenged with Late Leaf Spot Pathogen, *Phaeoisariopsis personata*

Dilip Kumar\*, Pulugurtha Bharadwaja Kirti

Department of Plant Sciences, School of Life Science, University of Hyderabad, Hyderabad, India

\* [dilip.hcu@gmail.com](mailto:dilip.hcu@gmail.com)

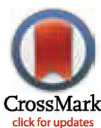

## Abstract

Late leaf spot is a serious disease of peanut caused by the imperfect fungus, *Phaeoisariopsis personata*. Wild diploid species, *Arachis diogeni*, is reported to be highly resistant to this disease and asymptomatic. The objective of this study is to investigate the molecular responses of the wild peanut challenged with the late leaf spot pathogen using cDNA-AFLP and 2D proteomic study. A total of 233 reliable, differentially expressed genes were identified in *Arachis diogeni*. About one third of the TDFs exhibit no significant similarity with the known sequences in the data bases. Expressed sequence tag data showed that the characterized genes are involved in conferring resistance in the wild peanut to the pathogen challenge. Several genes for proteins involved in cell wall strengthening, hypersensitive cell death and resistance related proteins have been identified. Genes identified for other proteins appear to function in metabolism, signal transduction and defence. Nineteen TDFs based on the homology analysis of genes associated with defence, signal transduction and metabolism were further validated by quantitative real time PCR (qRT-PCR) analyses in resistant wild species in comparison with a susceptible peanut genotype in time course experiments. The proteins corresponding to six TDFs were differentially expressed at protein level also. Differentially expressed TDFs and proteins in wild peanut indicate its defence mechanism upon pathogen challenge and provide initial breakthrough of genes possibly involved in recognition events and early signalling responses to combat the pathogen through subsequent development of resistivity. This is the first attempt to elucidate the molecular basis of the response of the resistant genotype to the late leaf spot pathogen, and its defence mechanism.

## OPEN ACCESS

**Citation:** Kumar D, Kirti PB (2015) Transcriptomic and Proteomic Analyses of Resistant Host Responses in *Arachis diogeni* Challenged with Late Leaf Spot Pathogen, *Phaeoisariopsis personata*. PLoS ONE 10(2): e0117559. doi:10.1371/journal.pone.0117559

**Academic Editor:** Silvia Mazzuca, Università della Calabria, ITALY

**Received:** May 30, 2014

**Accepted:** December 27, 2014

**Published:** February 3, 2015

**Copyright:** © 2015 Kumar, Kirti. This is an open access article distributed under the terms of the [Creative Commons Attribution License](https://creativecommons.org/licenses/by/4.0/), which permits unrestricted use, distribution, and reproduction in any medium, provided the original author and source are credited.

**Data Availability Statement:** All relevant data are within the paper and its Supporting Information files.

**Funding:** This study was supported by funding from the Department of Biotechnology, Government of India (BT/PR/6835/PB/16/627/2005). The funder had no role in study design, data collection and analysis, decision to publish, or preparation of the manuscript.

**Competing Interests:** The authors have declared that no competing interests exist.

## Introduction

Plants have their own surveillance system to recognize attacking microorganisms and to induce effective defence mechanisms. However, diminished encounter mechanism in the host results

in microbial invasion causing deleterious effects, such as diversion of nutrients, metabolites and toxin production, which enhance the disease progression and subsequently death of the tissue. Defence responses are frequently controlled by interaction between plant resistance (R) genes and pathogen avirulence (avr) genes through gene-for-gene interaction [1–3]. Plant-pathogen interaction studies have the immense commercial importance as pathogen attack can lead to massive yield penalties in the concerned crop. Understanding compatible and incompatible plant-pathogen interaction mechanism by which plants resist infection or susceptible to microbial pathogen is very important from an agricultural standpoint.

Defence responses include cell wall fortification, defence related responses such as hypersensitive response [2,4], production of reactive oxygen species [5], production of antimicrobial compounds [6], pathogenesis related protein [7] followed by production of phytoalexins and secondary metabolites. Peanut, *Arachis hypogaea* is one of the most important oil seed crops in the world, particularly in the Semi Arid Tropical region and is widely cultivated for its high quality edible oil and high protein content in the seed. Because of the rain-fed nature of the crop, its yields depend on the vagaries of nature in the form of biotic and abiotic stresses. Biotic stresses include diseases caused by fungal pathogens such as early leaf spots caused by *Cercospora arachidicola* and late leaf spot caused by *Phaeoisariopsis personata* (Berk & Curtis, previously known as *Cercospora personata*) and the rust caused by *Puccinia arachidis*. Late leaf spot disease is the most devastating of these and can lead to yield losses up to 70% under favourable conditions [8].

The peanut genome (2,800 Mb/1C) is large [9] in comparison to other plant models, *Arabidopsis* (128 Mb), rice (420 Mb), *Medicago* (500 Mb) and soybean (1,100 Mb). However, the peanut research community across the globe submitted nearly 252,832 expressed sequence tags (ESTs) in the public NCBI database till March 2012 in comparison to closely related soybean, which is represented by 1,461,624 ESTs [10]. It has also been reported that an analysis of the peanut transcriptome by RNA-seq using next-generation Illumina sequencing during seed development has generated a large number of unigenes and about four thousand SSR primers from three different varieties of peanut [11]. Guo, et al. [12] constructed cDNA libraries for peanut gene expression profiling in developing seeds at different reproductive stages during *Aspergillus parasiticus* infection. Despite these transcriptome analyses, there were no reports on the availability of sources of disease resistance genes in the cultivated genotypes of peanut. However, wild relatives of the Genus *Arachis* are a rich source of genes for disease resistance, which can be exploited by cloning through genomic approaches. In the genus *Arachis*, there are many wild species at diploid and allo-tetraploid levels that possess resistance to various biotic and abiotic stresses making them a rich repository of genes of commercial importance. There were many attempts aimed at transferring the genes for disease resistance from the wild species to the cultivated accessions through conventional breeding programs [13,14]. However, these attempts proved to be unsuccessful as the introgression of genes from these wild species also resulted in a linkage drag transferring unnecessary gene blocks carrying the desired genes, and making the introgressed material unsuitable for use in subsequent breeding programs.

Strategy to improve resistance is to characterize and clone novel resistance gene homologs from the resistant wild relatives. Several diploid wild species of the genus *Arachis*, viz., *A. diogeni*, *A. stenosperma*, *A. cardenasii*, *A. duranensis* etc. show very high levels of resistance to fungal and rust pathogens [15]. These will constitute ideal material to study the differences at molecular level involved in conferring resistance or susceptibility. Nobile, et al. [16] group elucidated the defence strategies of peanut by using the approach of suppression subtractive hybridization and Guo, et al. [17] used cDNA microarray strategy to identify the gene (s) for resistance to *Aspergillus flavus* in peanut. Payton, et al. [18] compared gene expression profile in a variety of peanut plant tissues using high density oligonucleotide microarrays. Recently, a

study on the differential gene expression in *Arachis diogeni* upon infection from the late leaf spot pathogen was reported by using Genefishing DEG premix kit in a differential display-reverse transcription PCR study [19] and differentially expressed peanut genes were identified and analyzed in response to challenge with bacterial wilt disease caused by *Ralstonia solanacearum* [20]. Peng, et al. [21] identified 119 TDFs from resistant and susceptible cultivars of peanut (Spanish type) using cDNA-AFLP after inoculation with the bacterial pathogen, *Ralstonia solanacearum* that causes wilt disease and studied their expression patterns.

Several methods are available for studying differential gene expression and cDNA-AFLP is an extremely efficient, sensitive and reproducible technique for the detection of differentially expressed genes [22,23]. It is a genome-wide expression analysis technique, which does not require prior sequence information, which makes it an excellent tool for gene discovery [24]. In relation to hybridization-based techniques, such as macro- and microarrays, cDNA-AFLP can discriminate between homologous genes belonging to gene families that are very common in plants. Besides, the sensitivity of the technique is very high resulting in an excellent detection of low-abundance transcripts and, both induced and repressed genes can be easily detected [25]. There are many examples of the successful use of the cDNA-AFLP as a genome-wide expression analysis tool of genes involved in various biological processes ranging from plant development to responses to environmental stimuli. Wang, et al. [26,27] revealed differential gene expression in incompatible and compatible interaction of wheat challenged with stripe rust fungus using cDNA-AFLP while Cheng, et al. [28] identified differentially expressed genes induced by bamboo mosaic virus infection in *Nicotiana benthamiana* by the same technique. Studies on abiotic stresses like response to salt in a halophyte, *Spartina alterniflora* [29], drought stress in *Populus hopeiensis* [30] and heat stress in rice [31] also revealed differentially expressed genes in transcriptome profiling by cDNA-AFLP leading to the identification of the candidate genes.

Proteomic analysis reveals the translational products of gene expression of plant under stress condition and its physiological state under particular conditions. Analysis of proteins is a direct approach to define the function of their associated genes as it linked to genome sequence information, which is important for functional genomics. There are scanty reports of proteome analysis that focuses on the study of stress response of peanut genotypes against various stress conditions. Wang, et al. [32] analysed peanut seed proteins differentially expressed in resistance and susceptible peanut cultivars in response to *Aspergillus flavus* and reported expression of several disease resistance associated protein. Proteomic study of peanut cotyledons in response to atoxigenic and toxigenic *A. flavus* strains revealed aflatoxin-triggered immune response [33]. Kottapalli, et al. [34,35] have analysed seed proteins of four peanut cultivars, which revealed differential expression of storage, allergenic proteins and also identified several physiologically significant candidate proteins associated with water-deficit stress tolerance mechanism in three peanut genotypes. Katam, et al. [36] carried out proteomic study in peanut leaf using a drought-tolerant variety and identified more than 200 proteins, predominantly carbohydrate metabolism and photosynthesis related proteins, which help to understand peanut leaf protein alterations under varied stress conditions.

Differential proteomic study of plant-pathogen interaction successfully reported in several plants. For example, Kaur, et al. [37] identified defence-related proteins, which are required for mounting a successful defence response in *Brassica juncea* against *Albugo candida*. Recently, Wu, et al. [38] analysed a plant-virus interaction in resistant and susceptible ecotypes of maize infected with sugarcane mosaic virus and identified several defence and stress related proteins during both compatible and incompatible interaction. The model plant, *Arabidopsis thaliana* differentially expressed proteins related to oxidative stress and metabolism in response to treatments with fungal elicitors in *Arabidopsis* cell cultures [39]. Castillejo, et al. [40] analysed root

pea proteome in response to *Orobanche crenata* inoculation and identified several proteins with protease activity which could play an important role in preventing the pathogen and some of metabolism and stress response protein.

The objective of this study is to investigate the molecular responses of the wild peanut, *Arachis diogeni* when challenged with the fungal pathogen, *Phaeoisariopsis personata* and we have identified genes and proteins differentially expressed during the incompatible interaction in wild peanut by the cDNA-AFLP and 2D gel electrophoresis technique. We have validated the expression patterns of some of the genes and the novelty of this study lies in a comparative analysis of the expression of these selected genes in compatible (susceptible) and incompatible (resistance) interactions at different time points through qRT-PCR. Till date, there is no report of proteome analysis that focuses on study of susceptible and resistant peanut genotypes against late leaf spot disease. The fold changes of differentially expressed proteins upon pathogen challenge were found to be high in case of *A. diogeni* (resistant) in comparison to *A. hypogaea* (susceptible). Here, we report a number of gene fragments that were found to be induced or repressed during incompatible interaction between the wild peanut and *P. personata*, and the proteins involved in signalling, metabolism, defence responses as well photosynthesis were found differentially expressed. Differentially expressed genes and proteins were discussed with emphasis on their involvement in defence, signal transduction and others cellular metabolic processes. These observations may possibly reveal genes and proteins, which might be useful in allowing the host plant to cope up with the invading pathogen and provide new insights into the molecular mechanism of plant-fungal interaction.

## Materials and Methods

### Plant material

Wild species, *Arachis diogeni* (accession number ICG-8962) supplied by the International Crops Research Institute for Semi Arid Tropics, Patancheru, India was used for the cDNA-AFLP and proteomics analysis of an incompatible interaction. For the qRT-PCR analysis of some candidate genes, peanut (*Arachis hypogaea*) cultivar cv. JL-24 (susceptible) was used in comparison to the wild species to validate some of the genes identified in the cDNA-AFLP analysis. Plants were maintained under greenhouse conditions. Shoots from wild and cultivated materials were detached from 60 day old plants with a sterile blade, washed thoroughly with sterile distilled water and maintained in plastic trays on moist filter paper with ends of the cuttings wrapped in water-soaked cotton. Trays were covered with polythene sheets to maintain high humidity and kept in growth room at  $25\pm 1^\circ\text{C}$  with a photoperiod of 14 h of light and 10 h of dark to enable the cuttings to get stabilized/ acclimatized till the formation of adventitious roots at the cut ends.

### Experimental treatments

Initially, the germinability of the conidia of *Phaeoisariopsis personata* was checked and the inoculum was prepared by suspending the conidia at a concentration of  $10^5/\text{ml}$  in 0.02% Tween-20 and spread on the abaxial surface of leaves homogeneously by using a paint brush and the rooted twigs were maintained under high humidity in the growth room. Control material corresponding to each time point was brushed with 0.02% Tween-20. Leaf tissues of treated and controls of both plant species, *Arachis diogeni* (resistant) and *Arachis hypogaea* cv. JL-24 (susceptible) were harvested at 0, 24, 48, 72 and 96 hours post inoculation and quickly frozen in liquid nitrogen, and stored at  $-80^\circ\text{C}$  prior to total RNA and protein extraction. Plants were observed for symptom development 20 days post inoculation (S1 Fig.).

## RNA extraction and double stranded cDNA synthesis

Total RNA from control and treated, *P. personata* infected leaves was extracted according to method of Chang, et al. [41]. To avoid DNA contamination, total RNA was treated with RNase free DNase I (Sigma-Aldrich, USA) according to the manufacturer's instructions. The quality of RNA was checked using a spectrophotometer (NanoDrop Technologies Inc., USA) at two wavelength ratios of A260/230 and A260/280 nm. The integrity of total RNA was determined by running samples on ethidium bromide stained 1.2% agarose gels using Tris boric acid EDTA (TBE) buffer. For cDNA synthesis 2 µg of total RNA from each sample was used for first strand synthesis followed by second strand synthesis using superscript double stranded cDNA synthesis kit (Invitrogen, Carlsbad, USA) as per the manufacturer's instructions.

## cDNA—AFLP analysis

About 500 ng double stranded cDNA was used for standard AFLP template according to Vos, et al. [22] and Bachem, et al. [23]. cDNA-AFLP was performed using the AFLP core reagent kit and the AFLP PreAmp primer mix-1 (Invitrogen, Life Technologies, Merelbeke, Belgium). In brief, the double stranded cDNA samples were digested with the restriction enzymes, *EcoRI* (Rare cutter) and *MseI* (Frequent cutter). The digested products of cDNA were ligated to adapters as provided in the kit and the sequences of these adapters are as follows: *EcoRI* adapter, 5'-CTCGTAGACTGCGTACC-3' and 3'-CTGACGCATGGTTAA-5', *MseI* adapter, 5'-GACGATGAGTCCTGAG-3' and 3'-TACTCAGGACTCAT-5'. The ligation products were then pre-amplified using *EcoRI* 5'-GACTGCGTACCAATTC-3' and *MseI* 5'-GATGAGTCCTGAGTAA-3' pre-amplification primers corresponding to the *EcoRI* and *MseI* adapters with one base pair extension. Pre-amplification was performed for 20 cycles at 94°C for 30 sec, 56°C for 60 sec and 72°C for 60 sec followed by 5 min at 72°C. Specific amplification was done using pre-amplified products as template with one primer labelled with Cyanine-5 (Cy5) fluorescent dye. Selective amplification primers have been provided with selective nucleotides at their 3' ends. The primers for this study are as follows: *EcoRI* E-AAG, E-AGC, E-ACG, E-AAC, E-ACA, E-ACT, E-ACC & E-AGG; and *MseI* M-CAA, M-CAC, M-CAG, M-CAT, M-CTA, M-CTC, M-CTG & M-CTT, generating a total of 64 different combinations. *EcoRI* series (E-series) primers were labelled with fluorescent dye Cy5 for visualization of the bands upon fluorescent scanning. Selective *MseI* primer and fluorescent (Cy5) labelled *EcoRI* primer combinations were then subjected to amplification of pre-amplified cDNA in thermal cycler following touchdown PCR conditions; 2 min denaturation at 94°C, followed by 30 s denaturation at 94°C, 30 s annealing at 65°C, 60 s extension at 72°C (13 cycles, scale down of 0.7°C per cycle); 30 s denaturation at 94°C, 30 s annealing at 56°C, 60 s extension at 72°C (23 cycles) and 7 min at 72°C. Six microlitre volume of the amplified products were mixed with equal volume of loading buffer (Bromophenol Blue in 25 mM EDTA and 1.5 mM formamide 1:5), heat denatured and resolved on a 8 M urea/6% denaturing polyacrylamide sequencing gel run with 1X TBE electrophoresis buffer at 110 watts. One of the gel glass plates was treated with the bind Silane M-6514 (Sigma-Aldrich) to stick the gel while sigma cote (Sigma-Aldrich) was applied on the second glass plate to repel the gel. The resulting glass-backed polyacrylamide gel has been used to perform silver staining for the visualization of the amplification products.

## Fluorescence scanning, silver staining and isolation of transcript-derived fragments (TDFs)

Sandwich gel was scanned on Typhoon imager (Typhoon Trio and Typhoon 9410) for the detection of bands having Cy5-labelled primers applying a laser excitation at 633 nm and an

emission filter at 670 nm (S2 Fig.). Then, the gel was silver stained in a 40 X 30 cm plastic tray on a shaker as described by Creste, et al. [42] with modifications. Silver stained and visualized differentially expressed TDFs were excised from the gel with a surgical blade and eluted in 100  $\mu$ l of sterile double distilled water. They were heated at 95°C for 15 min and then, hydrated overnight at 4°C according to Baisakh, et al. [29]. Five  $\mu$ l of eluted DNA was used for re-amplification by using same primer combination and identical PCR conditions. The PCR products were examined on a 1.2% agarose gel and visualized on an UV transilluminator using ethidium bromide stain. The products were further purified using gel extraction kit (Sigma-Aldrich, USA).

### Cloning and sequence analysis of TDFs

The eluted amplicons were cloned into the pTZ57R/T cloning vector (Fermentas, Germany) and sequenced commercially. Sequence information of cloned TDFs was analysed by searching for homologous sequences in non-redundant and EST databases of NCBI using basic local alignment search tools (Blastn and Blastx). Annotation was based on the best match found in blastx alignment. The putative functions of the identified genes were assigned based on their similarity with other genes available in the database. The sequences were submitted to genbank (NCBI) and the accession numbers were released in public database (S3 Table).

### Total protein extraction and two dimensional gel electrophoresis (2D-GE)

Proteins were extracted from the sampled leaf tissues by phenol extraction method as described by Sarvanan and Rose [43] with some modifications. One gram of groundnut leaf tissues were ground suspended in 10 ml of the extraction buffer (0.5 M Tris—HCl at pH 7.5, 0.7 M sucrose, 0.1 M KCl, 50 mM EDTA, 2%  $\beta$ -mercaptoethanol and 1 mM PMSF). Equal volume of phenol saturated with Tris-HCl (pH 7.5) was added, mixed for 30 min at 4°C and centrifuged at 6,000 g for 25 min at 4°C. The upper phenolic phase was collected and an equal volume of extraction buffer was added to it and this step was repeated again. Four volumes of 0.1 M ammonium acetate in methanol was added and kept overnight at -20°C for protein precipitation. The samples were then centrifuged at 12,000 g at 4°C for 20 min and the precipitate was washed three times each in ice cold methanol as well as in ice cold acetone and air dried. The precipitates were re-suspended in 500  $\mu$ l of rehydration buffer [7 M (w/v) urea, 2 M (w/v) thiourea, 4% (w/v) CHAPS, 30 mM DTT, 0.8% (v/v) immobilized pH gradient (IPG) buffer pH range 4–7 (GE Healthcare, Uppsala, Sweden)], insoluble material was removed by centrifugation and the protein concentration was estimated by Bradford assay using BSA as a standard.

800  $\mu$ g of total protein in rehydration buffer in a total volume of 320  $\mu$ l was used for passive rehydration of 18 cm immobilized pH gradient (IPG) strips (18 cm, 4–7 pH linear gradient; Amersham, GE). Active rehydration of protein was done on immobilized pH gradient strips for 12 h at 50 V. Rehydration and focusing was carried out in Ettan IPGphor II (GE Healthcare) at 20°C, using the following program: 30 minutes at 500 V, 3 h to increase from 500 to 10,000 V and 6 h at 10,000 V (a total of 60,000 Vh). After IEF, strips were equilibrated twice to reduce the protein followed by alkylation for 25 minutes with gentle rocking at room temperature (25  $\pm$  2°C) in the equilibration buffers using 2% (w/v) DTT and 2.5% (w/v) iodoacetamide respectively. The proteins were separated in the second dimension SDS-PAGE (12% vertical polyacrylamide slab gels) at 10 mA gel<sup>1</sup> for 1 h and then 38 mA gel<sup>1</sup> for 6 h, using an Ettan-Dalt6 chamber (GE Healthcare). Gels were stained with modified Coomassie staining [44]. Protein gels were scanned by a calibrated densitometric scanner (GE Healthcare) and spot

detection, normalization, gel matching, expression analyses and statistics were conducted with Image Master 2D Platinum v. 6.0 image analysis software (Amersham Biosciences). Proteins that displayed one and half fold or greater changes in the relative spot volume were considered as altered expressed proteins.

### In gel digestion and mass spectrometry (MS)

Interested protein spots were excised from three coomassie-blue stained replicated gels and destained with 200  $\mu\text{L}$  of 50% acetonitrile (ACN) in 50 mM of ammonium bicarbonate ( $\text{NH}_4\text{HCO}_3$ ) until completely destained. Thereafter, the gel pieces were treated with 10 mM DTT in 50 mM  $\text{NH}_4\text{HCO}_3$  and incubated at 56°C for 1 h. This was followed by treatment with 55 mM iodoacetamide in 50 mM  $\text{NH}_4\text{HCO}_3$  for 45 min in dark at room with temperature at  $25 \pm 2^\circ\text{C}$ . The gel pieces were then washed with 25 mM  $\text{NH}_4\text{HCO}_3$  and ACN, dried in Speed Vac at ambient temperature and rehydrated in 15  $\mu\text{L}$  of 25 mM  $\text{NH}_4\text{HCO}_3$  solution containing 25 ng  $\mu\text{L}^{-1}$  trypsin at 4°C for 10 minutes and then digested at 37°C overnight (sequencing grade, Promega Corporation, Wisconsin, USA). After incubation, a short spin was given and the supernatant was collected in a fresh eppendorf tube. The left gel pieces were further sonicated for 10 minutes followed by frequent vortexing for 5 min in 10  $\mu\text{L}$  of 0.1% trifluoroacetic acid (TFA) and 100% ACN (1:1) to extract the remaining peptides. This extraction step was repeated twice to improve the extraction yield. The supernatants were pooled together and dried using Speed Vac and were reconstituted in 5  $\mu\text{L}$  of 100% ACN and 0.1% TFA (1:1 v/v). The above sample (1  $\mu\text{L}$ ) was mixed with 1  $\mu\text{L}$  of a cyano-4-hydroxycinnamic acid (CHCA) matrix in 50% ACN and 1% TFA (1:1) and 2  $\mu\text{L}$  of samples were spotted onto a MALDI plate and dried at room temperature for mass spectrophotometry. Matrix-assisted laser desorption/ionization time of flight mass spectrometric (MALDI-TOF MS) analysis was carried out using MALDI-TOF/TOF mass spectrometer (Bruker Autoflex III Smartbeam, Bruker Daltonics, Bremen, Germany) according to the protocol of Shevchenko, et al. [45] with minor modifications. Mass data acquisitions were piloted by FlexControl 3.0 (Build 100) software using batched-processing and automatic switching between MS and MS/MS modes. Peptide precursor ions corresponding to contaminants including keratins and trypsins autolytic products were excluded in a mass tolerance of  $\pm 0.5$  Da. The filtered precursor ions with a user defined threshold were selected for the MS/MS scan.

### Protein identification through peptide mass fingerprinting and MS/MS analysis

The MALDI-TOF/TOF data were loaded into the MASCOT program (<http://www.matrixscience.com>) employing Biotools software (Bruker Daltonics) and protein identification was performed against the NCBI nr and Swiss-Prot databases using a combination of MS (peptide mass fingerprint approach) with MS/MS. The taxonomic category was set to *Viridiplantae* (Green plants). The other search parameters were: monoisotopic peptide mass ( $\text{MH}^+$ ); one missed cleavage per peptide; enzyme, trypsin; precursor-ion mass tolerance on an average 200 ppm; MS/MS fragment-ion mass tolerance, 0.6 Da; variable modifications like carbamidomethylation (C) for cysteine and oxidation for methionine (M) were allowed. If a protein spot matched multiple proteins under different accession numbers, the candidate protein with the maximum Mascot score were selected. The nearest experimental MW (molecular weight) and PI (isoelectric point) values to the theoretical values (having the same Mascot score) were given equal weightage in spot selection. The identified proteins were named according to the corresponding annotations in NCBI and Swiss-Prot.

## Quantitative real time PCR analysis

qRT-PCR was carried out for nineteen selected gene fragments at different time points after treatment with the fungal pathogen to validate the differential gene expression data obtained from cDNA-AFLP analysis. Leaf tissues of resistant (*Arachis diogeni*) and susceptible (*Arachis hypogaea*) plant materials challenged with *Phaeoisariopsis personata* and the samples were collected at 0, 24, 48, 72, 96 hpi (hour post inoculation) as well as mock inoculated plants. Gene specific primers were designed for 19 TDFs (S1 Table) chosen for validation, using oligo analyzer software (IDT). The total RNA (2 µg) treated with DNase I was reverse transcribed to first strand cDNA with oligo dT (18 mer) and random hexamer primer for Alcohol dehydrogenase-3 and 60S ribosomal protein respectively, using SMART MMLV Reverse Transcriptase (Clontech, Becton Dickinson, USA). First strand cDNA samples were diluted 10 times and 1 µl of the diluted reaction mixture was taken as qRT-PCR template in a 20 µl total reaction volume containing 0.4 µM gene-specific primers and 10 µl SYBR Premix Ex Taq with ROX (TAKARA BIO INC.) and the samples were appraised in three technical replicates including three non-template as the negative control. PCR analysis was carried out in Realplex (Eppendorf, Germany) Amplifier with the following cycle parameters: 95°C for 5 min; 40 cycle of 95°C for 20 s, 58°C for 20 s, 72°C for 20 s followed by melting curve to ensure that each amplicon was a single product. Alcohol dehydrogenase class III (*adh3*) and 60S ribosomal protein genes were used as internal control for calculating relative quantification of gene expression as these are the most stable reference gene for *Arachis* to normalize the real time amplification data [46]. Relative fold change in RNA expression was estimated using threshold cycle ( $C_T$ ) to calculate the relative fold change (RFC) in each time point of infected sample compared to control conditions by  $\Delta\Delta C_T$  method [47].

## Results

### Late leaf spot infection analysis in peanut leaves of resistant and susceptible plants

We have investigated pathogenesis pattern of *P. personata* in peanut during infection by light microscope and found that leaf spot disease appeared on the susceptible host plant (*Arachis hypogaea* cv. JL-24) after 10–12 days post inoculation of fungal conidia, while no such disease symptoms were found on the resistant wild species (*Arachis diogeni*). An early stage was chosen for analysis, as the conidia of *P. personata* were observed to germinate after 12–24 hpi (S1 Fig.) and their germ tubes enter the plant cells directly via the epidermis or more frequently through stomata, allowing the intracellular mycelial growth [48,49]. Spots were fully developed after 20–24 days post inoculation in compatible interaction, but no such lesions were observed in incompatible interaction (S1 Fig.). We chose to identify changes in gene and protein expression analysis in incompatible and compatible interaction at early stage of infection.

### Identification of differentially expressed transcripts during *A. diogeni* and *P. personata* interaction

We carried out a cDNA-AFLP analysis on the RNA samples of *Arachis diogeni* a wild accession as control and treated samples, which were pooled from different stages such as 0, 24, 48, 72, 96 hpi of infection with *P. personata* along with a mock treatment. A total 64 primer combinations were used to visualize 4047 TDFs in control and treated samples. The number of amplified fragments varied from 30 to 55 per lane and their sizes ranged from 75 to 700 bp depending upon primer combinations and a representative gel picture was illustrated in S2 Fig. A total 233 differentially expressed gene fragments were selected on the basis of their intensity



differences between control and treated sample, of which 125 were upregulated, 64 downregulated and 44 were point expressed, indicating that genes were expressed during interaction and the point expressed TDFs were classified under upregulated gene fragments. These selected TDFs were recovered from gels, re-amplified, sub-cloned and sequenced commercially.

## Gene sequence analysis

The sequences of the 233 transcript derived fragments were annotated by similarity search using the basic local alignment search tool (BLASTX & BLASTN) program against the non-redundant (nr) public database of the NCBI-GenBank. About half of the TDFs were identified to be coding for hypothetical proteins with no significant similarity to existing sequences in the GenBank. This shows the importance of the detailed analyses of the hypothetical proteins in identifying novel genes involved in the tolerance to biotic and abiotic stresses.

According to Bevan's method [50], the TDFs were grouped into functional categories based on their homology to known proteins. A major group of 75 sequences (32.2%) showed no significant similarity, while 55 (23.6%) sequences were designated as unknown/hypothetical proteins. Genes involved in metabolism were found to be 53 (22.7%) and 15 (6.4%) sequences shared high similarity with genes functioning in signal transduction. The genes involved in defence and transcription factors shared equal number of 11 (4.7%) sequences, while the rest of the sequences were a group of genes involved in photosynthesis 5 (2.2%) and transport 8 (3.4%) (Fig. 1). Differentially expressed TDFs were identified on the basis of band intensity between control and treated samples. In comparison to control with high band intensity were considered as up-regulated while low intensity bands were grouped as down-regulated. The differentially expressed upregulated, downregulated TDFs were listed in Table 1 and their sequences were submitted to NCBI database with assigned accession numbers. Most of the sequences matched with the ESTs reported for *Glycine max* and *Medicago truncatula* with significant similarity.

## 2-D gel electrophoresis and protein expression profiling

Proteomic approach was studied to analyze the changes in protein profile during the interaction between wild and cultivated peanut genotypes and *P. personata* as compatible and incompatible interactions. Mostly, resistivity depends upon compatible or incompatible interaction between host and pathogen [51]. Host plants prevent disease development by inducing hypersensitive response in incompatible interaction whereas compatible interaction does not induce HR, results in disease development. In order to understand this mechanism, a comprehensive analysis is required. In this context, a proteomic approach was applied to analyze the changes in protein profile during early stage of peanut and *P. personata* interaction. Therefore, leaf samples were selected for proteomic analysis, which were pooled from different stages such as 0, 24, 48, 72, 96 hrs after pathogen inoculation with *P. personata* along with a mock treatment. Triplicate gels were obtained from three independent experiments and the representative gels of *Arachis diogeni* (resistant) and *Arachis hypogaea* L. (susceptible) were illustrated in Fig. 2 and Fig. 3 respectively. We observed nearly 350–400 protein spots on susceptible peanut 2-DE gel while 450–500 spots were detected on wild peanut 2-DE gel stained with Coomassie brilliant blue dye. Thereafter, we systematically screened the protein spots that were differentially regulated in response to pathogen challenge using Image Master 2-D platinum version 6 software. There was around 80–85% correlation between biological repeats, indicating reliable reproducibility of the experiments.

Proteomic study indicated differential expression of proteins both in *A. diogeni* and *A. hypogaea* upon pathogen challenge. The fold change of differentially expressed proteins was found

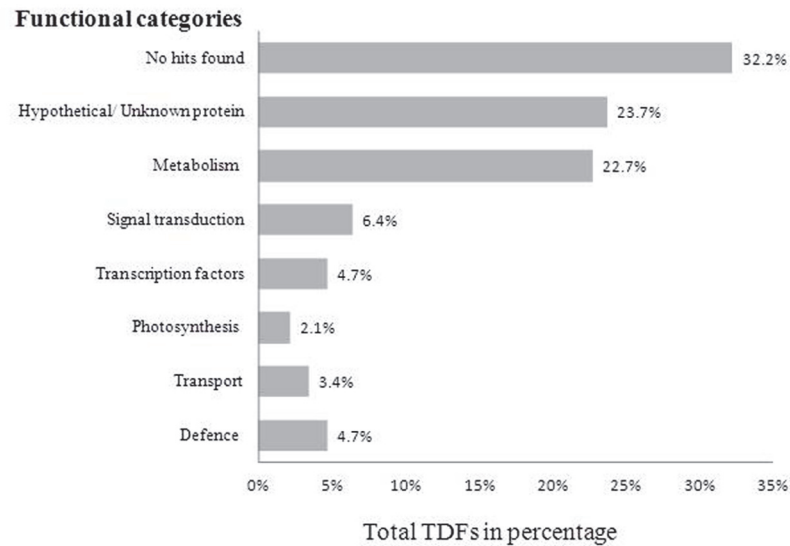

**Fig 1. Classification of differentially expressed transcripts (TDFs).** A total of 233 TDFs were classified based on the Blastx homology search.

doi:10.1371/journal.pone.0117559.g001

to be high in case of *A. diogeni* in comparison to *A. hypogaea* (Fig. 4). In treated *A. diogeni*, there were around 44 protein spots observed more than two-fold change, while in *A. hypogaea* only 17 protein spots were found more than two-fold expression. There were 22 and 14 protein spots depicted with more than three- and five-fold higher expression respectively in treated *A. diogeni* in comparison to susceptible, where as 15 and 7 spots were found similar expression. Five protein spots were detected more than ten-fold expression in *A. diogeni*, while only two spots were found with such enhanced changes in *A. hypogaea* L. The fold change profiling of proteins are illustrated in Fig. 4. Regulated proteins were determined based on the two basic criterion, reproducibility and fold change (% volume) at least  $\geq 1.5$  times.

A total of 45 up-regulated and novel protein spots (26 spots from *Arachis diogeni* and 19 spots from *Arachis hypogaea* L.) were selected with reliable expression pattern in peanut and *P. personata* interaction for MALDI TOF-TOF analysis. Among 45 spots, only 28 proteins were successfully identified with putative function (Table 2), while the rest 17 did not show any significant hits either in the NCBI or Swiss-Prot databases and hence, were not considered. Out of 28 differentially expressed proteins, 16 identified proteins were found to be up-regulated in *Arachis diogeni*, whereas 12 protein spots were found up-accumulated in *Arachis hypogaea* L. We have studied the relative abundance of 28 differentially expressed proteins of resistant and susceptible variety of peanut in comparison with the respective control.

### Identification and analysis of differentially regulated proteins

According to Bevan's [50] method, the identified proteins obtained from *Arachis diogeni* (resistant) were grouped into functional categories based on their homology to known proteins. A major group of 6 spots (37.5%) coincided with photosynthesis related proteins, while 4 spots (25%) were designated as metabolism proteins. Proteins involved in signal transduction and secondary metabolism were found to be share an equal number of 2 (12.5%) spots. The proteins associated to defence responses were found 3 (18.75%) spots (Fig. 5). The differentially expressed proteins from resistant and susceptible peanut plants were listed in Table 2. Differentially expressed proteins related to photosynthesis are Oxygen-evolving enhancer protein,

**Table 1. Important gene fragments and their significant similarity; U- Upregulated, D- Downregulated.**

| TDF No. | Accession | Length | U/D | Annotation (BlastX), Organism                                                                     | E- value |
|---------|-----------|--------|-----|---------------------------------------------------------------------------------------------------|----------|
|         |           |        |     | Signal transduction                                                                               |          |
| 1.      | GU011970  | 309    | D   | Zinc finger protein, putative [ <i>Ricinus communis</i> ]                                         | 6e-44    |
| 2.      | FJ581437  | 541    | D   | Receptor kinase, putative [ <i>Ricinus communis</i> ]                                             | 6e-99    |
| 3.      | GU320766  | 120    | U   | DNA-binding SAP; Zinc finger, MIZ-type; Zinc finger, FYVE/PHD-type [ <i>Medicago truncatula</i> ] | 2e-07    |
| 4.      | GQ922055  | 358    | U   | Serine/threonine-protein kinase PBS1, putative [ <i>Ricinus communis</i> ]                        | 7e-58    |
| 5.      | GU592825  | 231    | U   | Protein kinase (PK) [ <i>Fagus sylvatica</i> ]                                                    | 2e-23    |
| 6.      | GU592827  | 420    | D   | DNAJ heat shock N-terminal domain-containing protein [ <i>A. thaliana</i> ]                       | 1e-68    |
| 7.      | GU133626  | 243    | U   | Chaperone protein DnaJ-like [ <i>Glycine max</i> ]                                                | 6e-06    |
| 8.      | GU326970  | 126    | U   | F-box family protein [ <i>Populus trichocarpa</i> ]                                               | 6e-06    |
| 9.      | GU062406  | 213    | U   | Sister chromatid cohesion 1 protein, putative [ <i>Ricinus communis</i> ]                         | 1e-18    |
|         |           |        |     | Defence                                                                                           |          |
| 10.     | EU935215  | 104    | U   | Cystatin [ <i>Spinacia oleracea</i> ]                                                             | 9e-20    |
| 11.     | GQ922057  | 351    | U   | SGT1-2 [ <i>Glycine max</i> ]                                                                     | 6e-53    |
| 12.     | GQ922059  | 429    | U   | Heat shock 70 kDa protein, mitochondrial-like [ <i>Glycine max</i> ]                              | 6e-89    |
| 13.     | GU592820  | 351    | U   | CC-NB-LRR type disease resistance protein Rps1-k-2 [ <i>Glycine max</i> ]                         | 4e-34    |
| 14.     | GQ466607  | 666    | U   | Thaumatococin-like protein 1a-like [ <i>Glycine max</i> ]                                         | 7e-93    |
| 15.     | JN160607  | 240    | U   | Vacuolar-processing enzyme-like [ <i>Glycine max</i> ]                                            | 9e-41    |
| 16.     | FJ581436  | 298    | U   | rac GTPase activating protein 1 [ <i>Lotus japonicus</i> ]                                        | 2e-24    |
| 17.     | GU785018  | 285    | U   | NADPH oxidoreductase/15-Hydroxyprostaglandin dehydrogenase [ <i>Medicago truncatula</i> ]         | 1e-47    |
|         |           |        |     | Metabolism                                                                                        |          |
| 18.     | GU223572  | 408    | U   | Isoamyl acetate-hydrolyzing esterase, putative [ <i>Ricinus communis</i> ]                        | 1e-57    |
| 19.     | GU223575  | 201    | U   | Late embryogenesis abundant protein Lea14-A, putative [ <i>Ricinus communis</i> ]                 | 6e-11    |
| 20.     | GU223576  | 142    | U   | Similar to beta-glucosidases [ <i>Arabidopsis thaliana</i> ]                                      | 1e-11    |
| 21.     | GU011969  | 440    | D   | Ribonucleoprotein, chloroplast, putative [ <i>Ricinus communis</i> ]                              | 2e-52    |
| 22.     | GU223577  | 288    | D   | Nucleotide binding protein, putative [ <i>Ricinus communis</i> ]                                  | 3e-52    |
| 23.     | GU011971  | 150    | U   | Sedoheptulose-bisphosphatase precursor [ <i>Arabidopsis thaliana</i> ]                            | 2e-28    |
| 24.     | GU223578  | 310    | U   | Exostosin-like [ <i>Medicago truncatula</i> ]                                                     | 3e-27    |
| 25.     | EU935216  | 362    | U   | Adenosine 5'-phosphosulfate reductase [ <i>Glycine max</i> ]                                      | 4e-74    |
| 26.     | GU320767  | 115    | U   | Putative beta-galactosidase [ <i>Glycine max</i> ]                                                | 5e-15    |
| 27.     | GU320768  | 246    | U   | Putative mutator sub-class protein [ <i>Arachis hypogaea</i> ]                                    | 8e-17    |
| 28.     | FJ231268  | 206    | U   | Methionine synthase [ <i>Glycine max</i> ]                                                        | 2e-32    |
| 29.     | GU320771  | 669    | D   | Amine oxidase, putative [ <i>Ricinus communis</i> ]                                               | 6e-148   |
| 30.     | FJ621571  | 498    | D   | Similar to cysteine protease Cp5 [ <i>Vitis vinifera</i> ]                                        | 1e-61    |
| 31.     | FJ621572  | 426    | D   | Polygalacturonase precursor [ <i>Glycine max</i> ]                                                | 5e-63    |
| 32.     | GU326969  | 261    | D   | Endo beta n-acetylglucosaminidase, putative [ <i>Ricinus communis</i> ]                           | 6e-12    |
| 33.     | GU326971  | 300    | U   | Polyprotein [ <i>Sorghum bicolor</i> ]                                                            | 1e-18    |
| 34.     | GU326972  | 213    | U   | Retrotransposon gag protein [ <i>Arachis hypogaea</i> ]                                           | 8e-29    |
| 35.     | GQ922058  | 432    | U   | Dihydroflavonol-4-reductase [ <i>Medicago truncatula</i> ]                                        | 8e-62    |
| 36.     | GU473169  | 288    | U   | Probable NADH dehydrogenase-like [ <i>Glycine max</i> ]                                           | 2e-29    |
| 37.     | GU473170  | 267    | D   | Cellulose synthase catalytic subunit [ <i>Gossypium hirsutum</i> ]                                | 3e-57    |
| 38.     | GU473171  | 315    | U   | Microtubule-associated protein, putative [ <i>Ricinus communis</i> ]                              | 1e-27    |
| 39.     | GU576547  | 552    | U   | GIGANTEA [ <i>Glycine max</i> ]                                                                   | 2e-99    |
| 40.     | GU576549  | 285    | U   | Peroxisomal fatty acid beta-oxidation multifunctional protein [ <i>Glycine max</i> ]              | 9e-42    |
| 41.     | GU062405  | 240    | U   | Glycine-rich protein [ <i>Arabidopsis thaliana</i> ]                                              | 5e-23    |
| 42.     | GU576554  | 150    | U   | Non-phosphorylating glyceraldehyde-3-phosphate dehydrogenase [ <i>Pisum sativum</i> ]             | 1e-26    |
| 43.     | GU592818  | 198    | U   | Phytochrome A1 [ <i>Glycine max</i> ]                                                             | 1e-28    |

(Continued)

Table 1. (Continued)

| TDF No.        | Accession | Length | U/D | Annotation (BlastX), Organism                                                                    | E- value |
|----------------|-----------|--------|-----|--------------------------------------------------------------------------------------------------|----------|
| 44.            | GQ979706  | 226    | U   | Nucleic acid binding protein, putative [ <i>Ricinus communis</i> ]                               | 4e-47    |
| 45.            | GU592826  | 633    | D   | Granule-bound glycogen (starch) synthase [ <i>Astragalus membranaceus</i> ]                      | 1e-123   |
| 46.            | GU785014  | 135    | U   | N-alpha-acetyltransferase 35, NatC auxiliary subunit-like [ <i>Glycine max</i> ]                 | 3e-15    |
| 47.            | GU785017  | 153    | U   | Short-chain dehydrogenase/reductase [ <i>Medicago truncatula</i> ]                               | 1e-16    |
| 48.            | FJ226754  | 338    | U   | ATP-dependent Clp protease regulatory subunit CLPX [ <i>Arabidopsis thaliana</i> ]               | 3e-66    |
| 49.            | JZ356629  | 210    | D   | UDP-glycosyltransferase 83A1-like [ <i>Glycine max</i> ]                                         | 1e-20    |
| 50.            | JZ356642  | 183    | U   | WD repeat-containing protein 48-like [ <i>Glycine max</i> ]                                      | 3e-18    |
| 51.            | JZ356660  | 192    | U   | Tyrosine decarboxylase [ <i>Medicago truncatula</i> ]                                            | 9e-08    |
| 52.            | GU326968  | 255    | U   | Gag-pol polyprotein [ <i>Phaseolus vulgaris</i> ]                                                | 9e-19    |
| 53.            | FJ231266  | 422    | D   | Multicopper oxidase, putative [ <i>Ricinus communis</i> ]                                        | 7e-57    |
| 54.            | GU576550  | 168    | U   | WD-repeat protein, putative [ <i>Ricinus communis</i> ]                                          | 4e-16    |
| Photosynthesis |           |        |     |                                                                                                  |          |
| 55.            | EU935214  | 355    | U   | Oxygen-evolving complex-related [ <i>Arabidopsis thaliana</i> ]                                  | 2e-57    |
| 56.            | FJ226755  | 210    | U   | Photosystem II type I chlorophyll a/b-binding protein [ <i>Glycine max</i> ]                     | 2e-38    |
| 57.            | GQ979704  | 187    | D   | Mg chelatase subunit (46 kD) [ <i>Glycine max</i> ]                                              | 1e-18    |
| 58.            | JZ356640  | 213    | U   | Chloroplast magnesium chelatase I subunit [ <i>Pisum sativum</i> ]                               | 3e-13    |
| 59.            | GQ922056  | 591    | U   | Cytochrome P450 monooxygenase CYP97C10 [ <i>Glycine max</i> ]                                    | 2e-125   |
| Transport      |           |        |     |                                                                                                  |          |
| 60.            | FJ231267  | 300    | D   | Nodulin 26-like protein [ <i>Medicago truncatula</i> ]                                           | 1e-32    |
| 61.            | GQ293093  | 129    | D   | AAA ATPase; ABC transporter, transmembrane region, type 1 [ <i>Medicago truncatula</i> ]         | 6e-08    |
| 62.            | GU062403  | 204    | D   | Protein alx, putative [ <i>Ricinus communis</i> ]                                                | 2e-17    |
| 63.            | GU576551  | 132    | U   | ATP/ADP transporter [ <i>Populus trichocarpa</i> ]                                               | 2e-34    |
| 64.            | GU062404  | 130    | U   | Cytochrome c biogenesis [ <i>Medicago truncatula</i> ]                                           | 5e-17    |
| 65.            | GU592822  | 147    | U   | Nucleobase ascorbate transporter [ <i>Populus trichocarpa</i> ]                                  | 4e-10    |
| 66.            | GQ466606  | 465    | D   | Glutathione-regulated potassium-efflux system protein kefB, putative [ <i>Ricinus communis</i> ] | 2e-63    |
| Transcription  |           |        |     |                                                                                                  |          |
| 67.            | GU320773  | 207    | D   | ATP-dependent RNA helicase eIF4A, putative [ <i>Phytophthora infestans</i> T30–4]                | 5e-35    |
| 68.            | GU473167  | 237    | U   | Squamosa promoter-binding protein, putative [ <i>Ricinus communis</i> ]                          | 1e-19    |
| 69.            | GU062402  | 354    | D   | Valine-tRNA ligase-like protein [ <i>Arabidopsis thaliana</i> ]                                  | 5e-67    |
| 70.            | GU320772  | 306    | U   | U3 small nucleolar RNA (U3 snorna) associated protein [ <i>Ricinus communis</i> ]                | 3e-53    |
| 71.            | JZ356597  | 135    | U   | tRNA dimethylallyltransferase 9-like [ <i>Glycine max</i> ]                                      | 8e-15    |
| 72.            | JZ356611  | 414    | U   | RNA-directed DNA polymerase homolog [ <i>Arabidopsis thaliana</i> ]                              | 3e-28    |
| 73.            | JZ356620  | 233    | U   | Reverse transcriptase [ <i>Pisum sativum</i> ]                                                   | 7e-18    |

doi:10.1371/journal.pone.0117559.t001

Ribulose-bisphosphate carboxylase activase, Light-harvesting chlorophyll a/b-binding protein and Photosystem II stability/assembly factor. Metabolism related proteins are Sedoheptulose-1,7-bisphosphatase, Glyoxalase I and Malate dehydrogenase. Proteins involved in secondary metabolism are Dihydroflavonol reductase and Terpenoid synthase. Protein identified related to signal transduction and defence are Putative F-box protein, Phytochrome A and Defensin-like protein, Monodehydroascorbate reductase, Glyceraldehyde-3-phosphate dehydrogenase respectively.

We also observed several differentially regulated protein spots in the *Arachis hypogaea* cv. JL-24 (Susceptible) upon pathogen inoculation. We have successfully identified 12 proteins, while the rest showed no significant hits in the database. We found that proteins involved in energy metabolism, such as Phosphoglycerate kinase and Ferredoxin-NADP reductase were up-regulated along with other metabolism related protein like alanine aminotransferase.

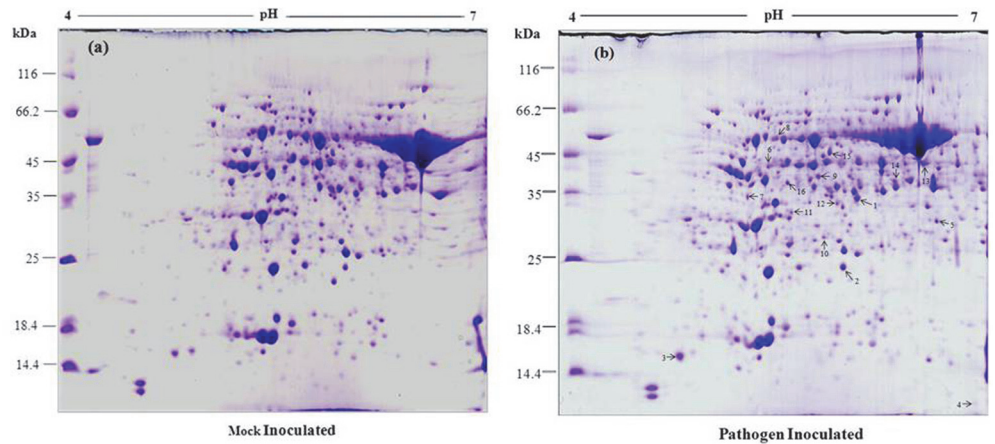

**Fig 2. 2-DE gel of peanut leaf protein samples from a *Arachis diogeni* (resistant) in response to inoculation with *P. personata*, (a) mock inoculated, (b) pathogen inoculated.** 800  $\mu$ g of total leaf protein was loaded on 18 cm IPG strip with a linear gradient of pH 4–7, 12% SDS-PAGE gels were used for second dimension.

doi:10.1371/journal.pone.0117559.g002

Moreover, most of the identified leaf proteins were found to be related to photosynthesis. Three up-regulated spots showed similarity to Rubisco activase and two was similar to Chlorophyll a/b binding protein, while another spot was identified as cytosolic ascorbate peroxidase with antioxidant properties. Identified proteins showed involvement in stress tolerance, energy metabolism, photosynthesis and protein synthesis under stress conditions. The details of the proteins identified using proteomic approach were presented in Table 2. The predicted molecular weight (MW) and pI of all these proteins were compared with their positions on the gel and were found consistent with some exception, which might be due to post-translational modifications or due to polymeric nature of the proteins. The matched peptide sequence and its number, reference organism, sequence coverage, experimental and theoretical molecular weight and pI, MS/MS score and related function of each protein were determined (Table 2). RuBisCO was identified as the most abundant and differentially expressed protein, which

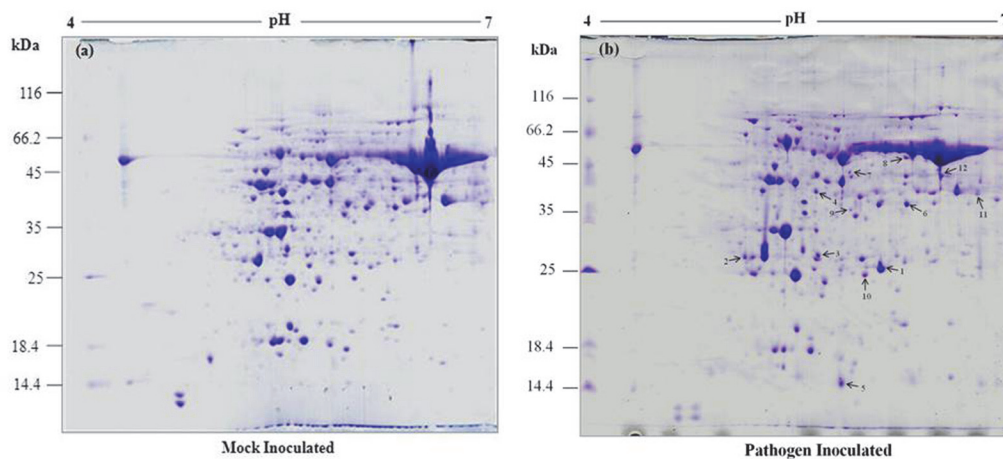

**Fig 3. 2-DE gel of peanut leaf protein samples from *Arachis hypogaea* L. (susceptible) in response to inoculation with *P. personata*, (a) mock inoculated, (b) pathogen inoculated.** 800  $\mu$ g of total leaf protein was loaded on 18 cm IPG strip with a linear gradient of pH 4–7, 12% SDS-PAGE gels were used for second dimension.

doi:10.1371/journal.pone.0117559.g003

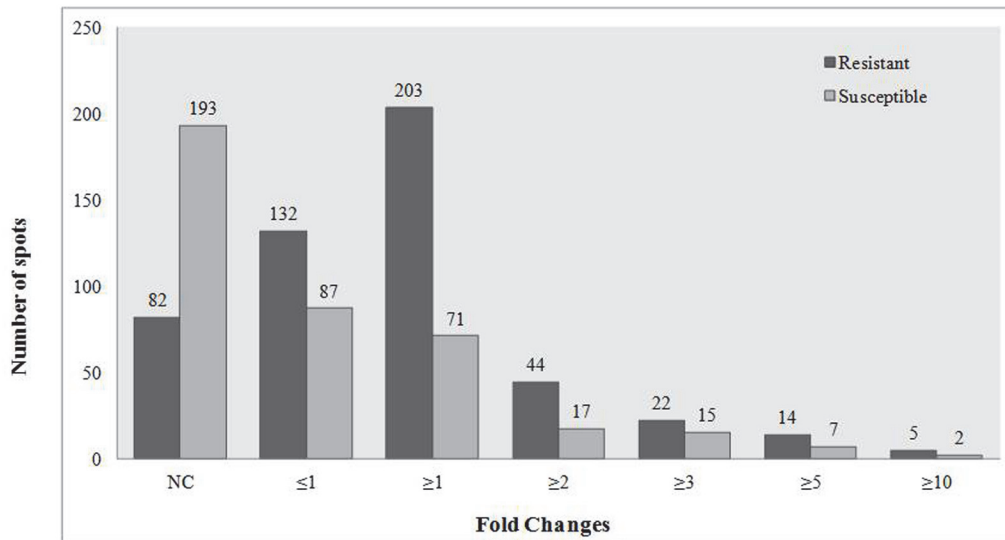

**Fig 4.** Bar diagram representing fold changes in leaf protein expression pattern in *Arachis diogeni* (Resistant) and *Arachis hypogaea* L. (Susceptible) upon pathogen challenge. NC- no change.

doi:10.1371/journal.pone.0117559.g004

could be due to presence of different isoforms of same protein or could be due to post-translational modification.

### qRT-PCR analysis of different TDFs to validate cDNA-AFLP results

Nineteen differentially expressed TDFs, of which most of them were related to defence, signal transduction and metabolism, were selected for validating the results obtained from cDNA-AFLP analyses using qRT-PCR. In this analysis, a comparison has been made for the expression of the chosen genes between the resistant wild peanut and the susceptible cultivated peanut at similar time points (0, 24, 48, 72 and 96 hpi) after the pathogen challenge and illustrated in Fig. 6 and S2 Table. This study showed that most of the gene fragments related to signal transduction and defence such as CC-NB-LRR, racGTPase activating protein, serine threonine protein kinase, zinc finger protein, thaumatin like protein (*TLP*), Protein kinase-6, late embryogenesis abundant (*LEA*) protein and cysteine protease were found to be upregulated within 24 h after the pathogen treatment in the resistant genotype compared to the susceptible cultivated genotype, which showed no such upregulation. Cysteine protease inhibitor has shown early response in the susceptible peanut plants i.e. upregulated at 24 and 48 h, while the wild peanut plants showed late response at 72 and 96 hrs. Leucine rich repeat- receptor like kinase (LRR-RLK) was found to be up-regulated in susceptible plants at 24 h, while no change was observed in the resistant plants, which was in agreement with our cDNA-AFLP data, where it was found to be downregulated. It is possible that it might be involved in downstream signaling in relation to pathogen recognition. Cysteine protease showed contrasting expression patterns. While it was observed downregulated upon pathogen challenge in cDNA-AFLP analysis, but was found to be upregulated upon validation by qRT-PCR analysis. Similarly, a zinc finger protein was found to be down-regulated in cDNA-AFLP analysis as against a second transcript that has shown up-regulation.

We examined transcript levels of six selected differentially expressed gene through quantitative real-time PCR, which were also found to be differentially expressed at 2-D proteomic analysis. We have found glyceraldehyde-3-phosphate dehydrogenase to be up-regulated within 24

**Table 2. Identification of differentially up-regulated proteins by MALDI-TOF-TOF in resistant and susceptible peanut upon interaction with *Phaeoisariopsis personata*.**

| Spot No. | Protein identified                                                                                 | Accession no. | Peptide sequence matched | Theoretical Mr/pI | Observed Mr/pI | S.C. (%) | MS/MS Score | Related function                               |
|----------|----------------------------------------------------------------------------------------------------|---------------|--------------------------|-------------------|----------------|----------|-------------|------------------------------------------------|
| Ad-1     | Ribulose-bisphosphate carboxylase activase common tobacco [fragment]                               | gij100380     | IVDTFPGQSIDFFGALR        | 26.0/5.01         | 27/5.9         | 7        | 83          | Photosynthesis                                 |
| Ad-2     | Oxygen-evolving enhancer protein 2, chloroplastic [ <i>Brassica juncea</i> ]                       | gij131390     | SITDYGSPEEFLSQVNYLLGK    | 23.4/4.91         | 24/5.7         | 9        | 79          | Regulation of photosystem-II                   |
| Ad-3     | Chloroplast ribulose-1,5-bisphosphate carboxylase/oxygenase [ <i>Morus alba</i> ]                  | gij119855475  | VPIIVTGNDFFSTLYAPLIR     | 27.3/4.76         | 16.5/4.8       | 11       | 90          | Photosynthesis                                 |
|          |                                                                                                    |               | IVDTFPGQSIDFFGALR        |                   |                |          |             |                                                |
| Ad-4     | Defensin like protein [ <i>Solanum tuberosum</i> ]                                                 | DF322_SOLTU   | FSGGNCHGFRR              | 8.8/9.33          | 9/6.8          | 33       | 58          | Defence                                        |
|          |                                                                                                    |               | MGPMRIAEAR               |                   |                |          |             |                                                |
| Ad-5     | Terpenoid synthase [ <i>Arabidopsis thaliana</i> ]                                                 | TPS08_ARATH   | DPQESNR                  | 69.5/6.15         | 29/6.7         | 3        | 68          | Secondary metabolite biosynthesis              |
|          |                                                                                                    |               | FPPSEWTNR                |                   |                |          |             |                                                |
| Ad-6     | Ribulose bisphosphate carboxylase/oxygenase activase, chloroplastic [ <i>Hordeum vulgare</i> ]     | RCAB_HORVU    | VPIIVTGNDFFSTLYAPLIR     | 47.4/7.59         | 43/5.4         | 8        | 127         | Photosynthesis                                 |
|          |                                                                                                    |               | LVDTFPGQSIDFFGALR        |                   |                |          |             |                                                |
| Ad-7     | Sedoheptulose-1,7-bisphosphatase, chloroplastic [ <i>Arabidopsis thaliana</i> ]                    | S17P_ARATH    | LLFEALQYSHVCK            | 42.7/6.17         | 34/5.1         | 8        | 170         | Metabolism                                     |
|          |                                                                                                    |               | GFPGTHEFLLLDGKQWQHVK     |                   |                |          |             |                                                |
| Ad-8     | Ribulose bisphosphate carboxylase/oxygenase activase 2, chloroplastic [ <i>Nicotiana tabacum</i> ] | RCA2_TOBAC    | VPIIVTGNDFFSTLYAPLIR     | 48.5/8.14         | 49/5.2         | 8        | 181         | Photosynthesis                                 |
|          |                                                                                                    |               | IVDTFPGQSIDFFGALR        |                   |                |          |             |                                                |
| Ad-9     | Putative F-box protein [ <i>Arabidopsis thaliana</i> ]                                             | FB217_ARATH   | LCLMACVKARDMR            | 46.2/8.44         | 45/5.9         | 4        | 68          | Signal transduction & regulation of cell cycle |
|          |                                                                                                    |               | NQSKEDESR                |                   |                |          |             |                                                |
| Ad-10    | Phytochrome A [ <i>Aristolochia tomentosa</i> ]                                                    | gij75674163   | MICDCYAKPVKVVQDER        | 27/6.33           | 28/5.4         | 16       | 80          | Signal transduction                            |
|          |                                                                                                    |               | TQTLLCDMLLRDSPLSIVSR     |                   |                |          |             |                                                |
| Ad-11    | Glyoxalase I [ <i>Picea sitchensis</i> ]                                                           | gij116781841  | ITSFLDPDGWK              | 32.8/5.04         | 33/5.6         | 3        | 66          | Metabolism                                     |
| Ad-12    | Dihydroflavonol reductase [ <i>Medicago truncatula</i> ]                                           | gij357458089  | ETGFDVVMINPGTALGPLIPPR   | 35.2/5.63         | 34/5.8         | 9        | 56          | Secondary metabolism                           |
|          |                                                                                                    |               | HLCVEAIR                 |                   |                |          |             |                                                |

(Continued)

Table 2. (Continued)

| Spot No. | Protein identified                                                                 | Accession no. | Peptide sequence matched  | Theoretical Mr/pl | Observed Mr/pl | S.C. (%) | MS/MS Score | Related function                               |
|----------|------------------------------------------------------------------------------------|---------------|---------------------------|-------------------|----------------|----------|-------------|------------------------------------------------|
| Ad-13    | Glyceraldehyde-3-phosphate dehydrogenase [ <i>Populus trichocarpa</i> ]            | gij224061855  | VVAWYDNEWGYSQR            | 47.5/6.79         | 47/6.6         | 6        | 101         | Metabolism/Defence                             |
|          |                                                                                    |               | GVLVDVCDVPLVSVDFR         |                   |                |          |             |                                                |
| Ad-14    | Malate dehydrogenase, cytoplasmic [ <i>Beta vulgaris</i> ]                         | gij11133601   | ELVADDAWLNGEFITTVQQR      | 35.8/5.89         | 37/6.3         | 6        | 60          | Metabolism                                     |
| Ad-15    | Monodehydroascorbate reductase like isoform 1 [ <i>Glycine max</i> ]               | gij50400859   | AAEEGKTVEEYDYLPHYFSR      | 46.9/5.73         | 47/5.8         | 4        | 72          | Defence                                        |
| Ad-16    | Photosystem II stability/assembly factor [ <i>Medicago truncatula</i> ]            | gij357473927  | FIDDKKGFVLGNDGVLLR        | 43.7/7.74         | 43/5.4         | 4        | 64          | Photosynthesis                                 |
| Ah-1     | Chlorophyll a/b-binding protein type III, partial, [ <i>Alonsoa meridionalis</i> ] | gij7271947    | WLAYGEIINGR               | 20.8/5.17         | 22/5.80        | 19       | 195         | Photosynthesis                                 |
|          |                                                                                    |               | GLGGSGDPAYPGGPFNPLGFGKDEK |                   |                |          |             |                                                |
| Ah-2     | Light-harvesting chlorophyll a/b-binding protein [ <i>Prunus persica</i> ]         | gij556367     | NRELEVIHSR                | 28.3/5.3          | 27.5/4.9       | 8        | 83          | Photosynthesis                                 |
|          |                                                                                    |               | NVSSGSPWYGPDR             |                   |                |          |             |                                                |
| Ah-3     | Ferritin-3, chloroplastic [ <i>Vigna unguiculata</i> ]                             | FRI3_VIGUN    | IAEYVTQLR                 | 28.5/5.54         | 28/5.4         | 9        | 90          | Iron homeostasis, ferroxidase activity         |
|          |                                                                                    |               | FFKESSEEEEREHAEK          |                   |                |          |             |                                                |
| Ah-4     | Photosystem II stability/assembly factor [ <i>Arabidopsis thaliana</i> ]           | gij15237225   | GFGILDVGYR                | 44.1/6.79         | 43/5.4         | 10       | 244         | Photosynthesis                                 |
|          |                                                                                    |               | GTGITEEFEEVPVQSR          |                   |                |          |             |                                                |
|          |                                                                                    |               | SAEMVTDEGAIYVTSNR         |                   |                |          |             |                                                |
| Ah-5     | Ribulose biphosphate carboxylase, small chain [ <i>Phaseolus vulgaris</i> ]        | gij21050      | EVDYLLR                   | 20.3/9.16         | 16/5.8         | 8        | 82          | Photosynthesis                                 |
|          |                                                                                    |               | IIGFDNVR                  |                   |                |          |             |                                                |
| Ah-6     | Ferredoxin-NADP reductase, isozyme, [ <i>Nicotiana tabacum</i> ]                   | FENR1_TOBAC   | ITGDDAPGETWHMVFSTEGEVPYR  | 40.7/8.37         | 38/6.2         | 11       | 71          | Regulating cyclic and non-cyclic electron flow |
|          |                                                                                    |               | DPNATVIMLATGTGIAPFR       |                   |                |          |             |                                                |
| Ah-7     | Ribulose biphosphate carboxylase activase [ <i>Nicotiana tabacum</i> ]             | gij100380     | VPIIVTGNDFFSTLYAPLIR      | 26/5.01           | 40/5.8         | 22       | 195         | Photosynthesis                                 |
|          |                                                                                    |               | IVDTFPGQSIDFFGALR         |                   |                |          |             |                                                |
|          |                                                                                    |               | LLEYGNMLVQEENVKR          |                   |                |          |             |                                                |
| Ah-8     | Phosphoglycerate kinase, cytosolic [ <i>Triticum aestivum</i> ]                    | gij129916     | KLASVADLYVNDAFGTAHR       | 42.1/5.64         | 47/6.1         | 4        | 118         | Energy Metabolism                              |
| Ah-9     | RUBISCO activase, [ <i>Cucumis sativus</i> ]                                       | gij266893     | VPIIVTGNDFFSTLYAPLIR      | 45.9/7.57         | 40/5.9         | 8        | 224         | Photosynthesis                                 |
|          |                                                                                    |               | LVDTFPGQSIDFFGALR         |                   |                |          |             |                                                |

(Continued)



Table 2. (Continued)

| Spot No. | Protein identified                                                          | Accession no. | Peptide sequence matched | Theoretical Mr/pl | Observed Mr/pl | S.C. (%) | MS/MS Score | Related function     |
|----------|-----------------------------------------------------------------------------|---------------|--------------------------|-------------------|----------------|----------|-------------|----------------------|
| Ah-10    | Cytosolic ascorbate peroxidase [ <i>Vigna unguiculata</i> ]                 | gij1420938    | YAADEDAFFADYAAAHQK       | 27/5.64           | 27/5.9         | 7        | 72          | Cellular antioxidant |
| Ah-11    | Phosphoglycerate kinase, chloroplastic [ <i>Chlamydomonas reinhardtii</i> ] | gij1172455    | KLAANADLYVNDAFGTAHR      | 49.2/8.84         | 48/6.4         | 4        | 188         | Energy Metabolism    |
|          |                                                                             |               | LAANADLYVNDAFGTAHR       |                   |                |          |             |                      |
| Ah-12    | Alanine aminotransferase 2 [ <i>Glycine max</i> ]                           | gij351724369  | IIFTNVGNPHALGQKPLSFPR    | 53.8/5.42         | 54/6.3         | 12       | 157         | Metabolism           |
|          |                                                                             |               | MVIINPGNPTGQCLSEANLR     |                   |                |          |             |                      |
|          |                                                                             |               | NVVCNFTEGAMYSFPQIR       |                   |                |          |             |                      |

Ad- *Arachis diogeni* (Resistant), Ah- *Arachis hypogaea* L. (Susceptible)

doi:10.1371/journal.pone.0117559.t002

hrs after the pathogen treatment in the resistant genotype compared to the susceptible cultivated genotype, which showed no such up-regulation. Photosystem II regulatory protein and oxygen evolving enhancer complex was found to be up-regulated at 72 and 96 hrs in the wild peanut respectively, while there was no such up-regulation in the susceptible peanut plants. Sedoheptulose-bisphosphatase, a metabolism related protein was found up-accumulated constantly up to 72 hrs in wild peanut compared to susceptible peanut, which did not evidence its upregulation. A secondary metabolism protein, dihydroflavonol reductase has shown early response in the wild as well as susceptible peanut plants i.e, upregulated at 24 hrs, and gradually decline at 48, 72 and 96 hrs. F-box family proteins that regulate diverse cellular processes was found to be up-regulated at different time point in both resistant as well as susceptible peanut.

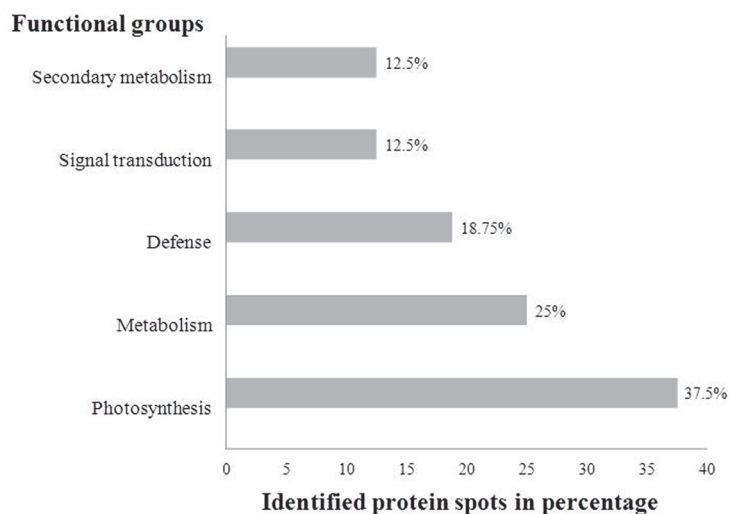

Fig 5. Classification of differentially expressed proteins identified. A total of 16 proteins of *Arachis diogeni* were classified based on homology search in database and their functional role in plant.

doi:10.1371/journal.pone.0117559.g005

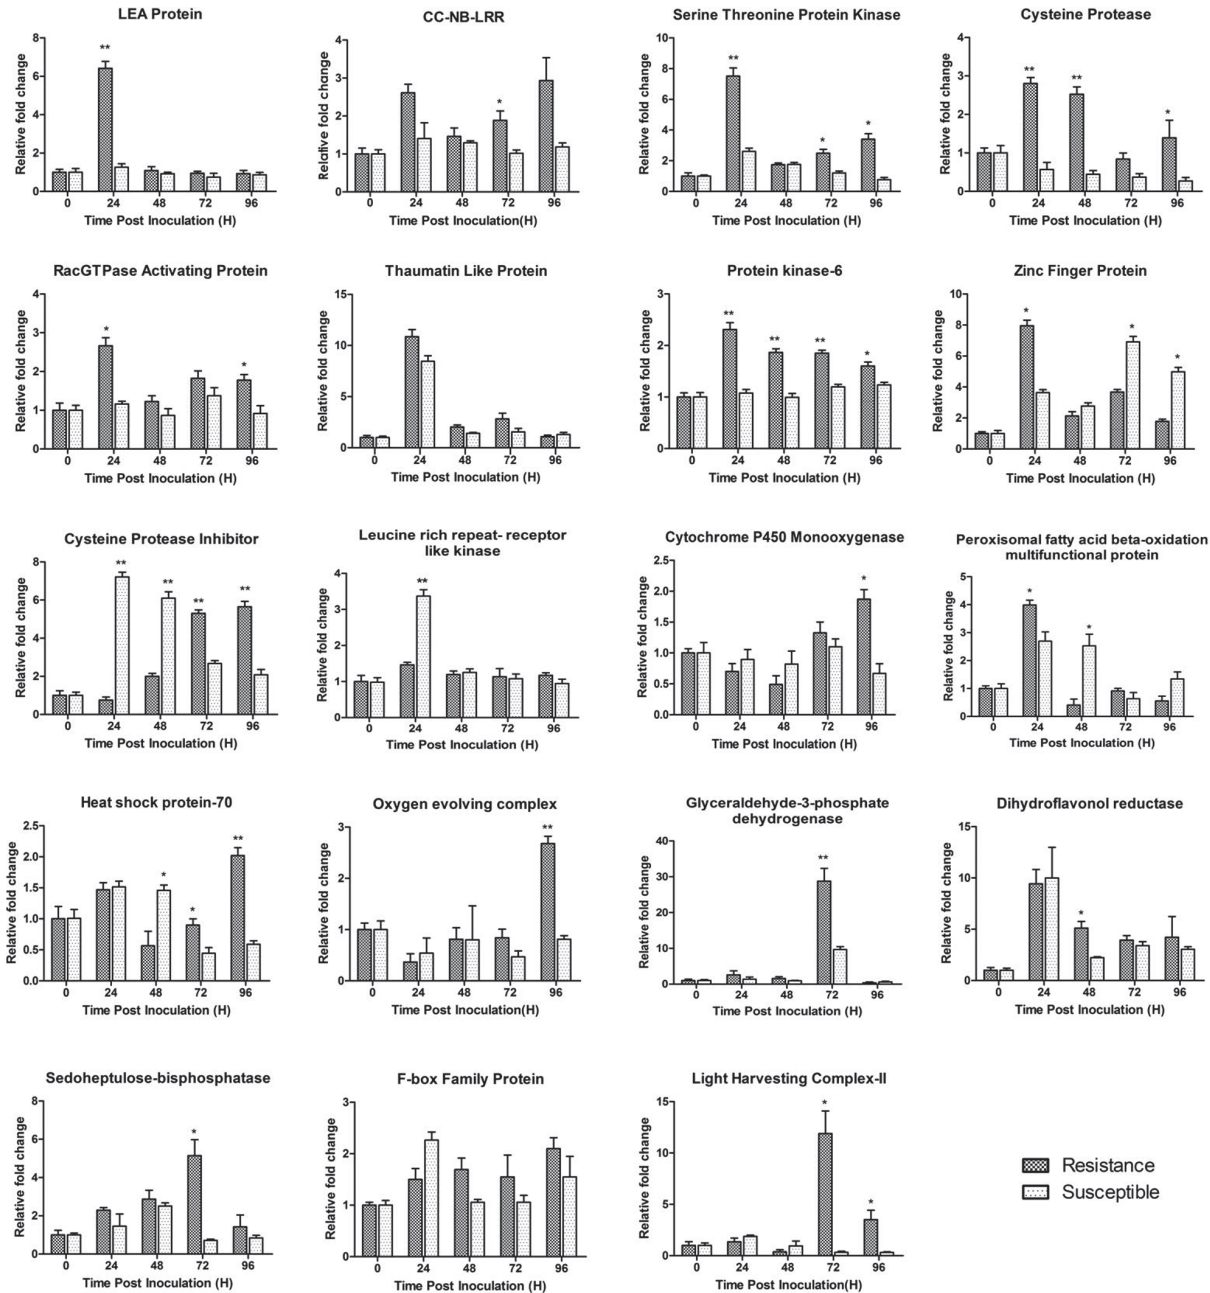

**Fig 6. Quantitative real-time PCR (qRT-PCR) analyses of 19 selected TDFs.** Leaf tissues were used for both inoculated and mock inoculated plants at 24, 48, 72 and 96 hpi, as well as mock-inoculated near 0 hpi. Relative gene quantification was calculated by comparative  $\Delta\Delta CT$  method. All data were normalized to the Alcohol dehydrogenase-3 and 60S ribosomal protein expression level as these were used as internal reference gene and data from three biological replicates mean  $\pm$  SD was plotted. Statistical analysis was performed with Student's t-test, asterisks indicate a significant difference between resistant (*Arachis diogeni*) and susceptible (*Arachis hypogaea* cv. JL-24) (\*  $P < 0.05$ , \*\*  $P < 0.01$ ).

doi:10.1371/journal.pone.0117559.g006

Of the total nineteen gene fragments, gene expression patterns of seventeen were similar to those observed in cDNA-AFLP and 2-D gel electrophoresis analysis except cysteine protease and zinc finger protein which were found downregulated in cDNA-AFLP analysis. The results indicate that cDNA-AFLP data and 2-D protein expression profile are mostly concordant with

qRT—PCR data, confirming the reliability of the results with minimum discrepancies. The transcripts of a LEA protein, cysteine protease, serine-threonine protein kinase, glyceraldehyde-3-phosphate dehydrogenase, oxygen evolving complex, sedoheptulose-bisphosphatase and Photosystem II regulatory protein showed very clear differences between the resistant and susceptible genotypes with the wild peanut showing strong upregulation.

## Discussion

Peanut is the most important oilseed-protein crop of semi-arid tropics with equal importance world-wide. This crop is highly susceptible to various foliar diseases, particularly the late leaf spot disease; and the damage to the crop can reach up to 70% under severe epidemic conditions, particularly when the crop receives an extended rainy season. Molecular studies on the peanut foliar diseases are very rare and the crop did not receive due attention it deserves. There were only two reports on the characterization of genes involved in peanut (*A. hypogaea*) -*P. personata* interaction [16,52] and also two reports in the wild relatives of *Arachis* that are highly resistant to several pathogens including *P. personata* [19,53]. Kumar and Kirti [19] reported several transcripts associated with phenylpropanoid pathway, such as phenylalanine ammonia-lyase, cinnamate 4-hydroxylase, cinnamyl alcohol dehydrogenase with significant roles in first line of defence such as cell wall deposition and lignifications. They have also reported the upregulation of a pathogen induced cyclophilin and characterized it and showed that constitutive expression of cyclophilin in tobacco has been associated with enhanced resistance against pathogen *R. solanacearum* and *P. parasitica* var. *nicotianae* [19].

Since the peanut genome sequence is not yet available in the international GenBanks, it is important to discover novel genes through alternative transcriptomic approaches. cDNA-AFLP method is a powerful approach for studying the differential gene expression and we used this technique to provide first large scale investigation of the genes expressed in the resistant wild peanut in its incompatible interaction between *Phaeoisariopsis personata*. This technique has been used successfully to study plant-pathogen interaction in several plants [26,54,55] and the results are reported to be highly reproducible [56] and have advantages over other commonly used gene display methods [57].

In the present study, the 233 differentially expressed gene fragments were grouped into functional categories based on their homology to known proteins. A major group of sequences showed no significant similarity while most of the sequences were designated unknown/hypothetical protein. The genes showing significant similarity to metabolism, photosynthesis, signal transduction, defence, transport and transcription factors were illustrated in Table 1. Nineteen differentially expressed TDFs were further validated by quantitative real time PCR. Of these, nine TDFs exhibited early response as they were up-regulated at 24 h time point after pathogen inoculation in resistance plants, while there was no major upregulation in susceptible plants except thaumatin like protein. Thaumatin like protein showed an early response as it was upregulated at 24 h after infection in compatible as well as incompatible interaction. This 24 h point also includes the time taken for the conidia to germinate. Nine TDFs exhibited late response in resistant plants and their transcripts were up-regulated at 72 and 96 h, while trivial changes were found in susceptible plants except cystatin. Cysteine protease inhibitor has shown early response as it is up-regulated at 24 and 48 h after infection in compatible interaction.

We have detected four transcripts with similarity to thaumatin like protein, a PR5 protein, which exhibited antifungal activity in vitro [58,59] as well as in vivo [60,61]. Cotton thaumatin like protein (*GbTLP*) in tobacco transgenic plants enhanced resistance against *Verticillium dahliae* [62]. It showed differential expression profile in wild peanut in the cDNA-AFLP analysis, but there was no significant difference between compatible and incompatible interaction in

quantitative real time analysis. Another transcript similar to cystatin has been found to be up-regulated both in cDNA-AFLP as well as quantitative real time analysis, and exhibit antifungal properties in several plants [63,64]. We have observed three transcripts of a disease resistance protein similar to CC-NB-LRR protein in our analysis. It is an R gene that confers resistance to various plant fungal pathogens [65,66] and has also been shown to impart leaf stripe resistance in barley [67]. Quantitative real time analysis also indicated up regulation in wild peanut, which could not be observed in susceptible peanut at various time points of pathogen inoculation. Two TDFs of 15-Hydroxyprostaglandin dehydrogenase, a homolog of NADPH oxidoreductase have been found in cDNA-AFLP analysis, which are reported to be involved in generating reactive oxygen species such as  $O_2^-$  &  $H_2O_2$  for exhibiting hypersensitive response [68,69]. It has also been shown to be involved in the suppression of human breast cancer and also can modulate estrogen receptor pathway [70]. *Arabidopsis thaliana* 15-Hydroxyprostaglandin dehydrogenase plays a distinct role in plant anti-oxidant defence [71]. This protein might be playing an important role in preventing pathogen invasion.

Protein kinases are known to play important roles in pathogen recognition through signaling and activation of plant defence mechanisms [72] through the phosphorylation of the target proteins. We have identified several TDFs encoding different protein kinases such as Leucine rich repeat receptor like kinase (LRR-RLK), Protein kinase-6, Serine-threonine protein kinase [16], Flag-tagged protein kinase domain of putative mitogen-activated protein kinase kinase kinase. Except the LRR-RLK, all other protein kinases were found to be induced in the wild peanut, while LRR-RLK was repressed in both cDNA-AFLP as well as quantitative real time analysis. Sugarcane LRR-RLKs have been shown to have roles in downstream signalling pathway, particularly in relation to endophytic bacterial association [73].

We have identified transcripts of proteins like vacuolar processing enzyme and cysteine proteases that are associated with cell death and induced during pathogen infection with in hypersensitive response [74]. Vacuolar processing enzyme has been reported as a cysteine proteinase that is responsible for the maturation of vacuolar proteins and exhibits caspase-1 like activity [75,76]. It exhibits endopeptidase activity and mediates TMV and mycotoxin-induced cell death [77,78]. We have found a cysteine protease, another cell death associated gene fragment in our studies and it has been shown to be involved in senescence [79] and various environmental stresses including hypersensitive cell death [80].

SGT1 is an essential component of signaling pathways leading to pathogen resistance and binds to the chaperone proteins, HSP70 in plants [81] and HSP90 in human, yeast, plants [82,83] indicating its role in regulating protein folding. SGT1 regulates defence responses triggered by various pathogens and interacts with RAR1 [84] and is essential for resistance conferred by multiple R genes [85,86]. It plays an important role in regulating process of cell death during compatible and incompatible plant-pathogen interaction [27].

In the present study, racGTPase was found to be differentially expressed and in quantitative RT-PCR analyses shown its expression reached the peak at 24 hpi in the resistant genotype, while no major changes in its expression were observed in susceptible variety. Rac GTPase protein plays an important role in plant defence against pathogen and its role in the production of reactive oxygen species (ROS) such as  $O_2^-$  and  $H_2O_2$  that are rapidly generated after infection leading to hypersensitive response, a form of programmed cell death in plants has been very clearly elucidated [87]. The expression of a rice racGTPase resulted in HR like response and resistance against a virulent strain of bacterial blight and blast fungus associated with an altered expression of defence related genes involved in the enhanced production of phytoalexins [88]. However, its function in R gene mediated disease resistance still needs to be established.

Several metabolism related proteins were found to be differentially expressed such as sedoheptulose biphosphatase (SBPase), LEA protein, methionine synthase, cellulose synthase,

Exostosin like protein, glycine rich protein, NADH dehydrogenase, glyceraldehyde phosphate dehydrogenase, peroxisomal fatty acid  $\beta$ -oxidation multifunctional protein, dihydroflavonol reductase, UDP glucosyl transferases, GDSL-like Lipase/Acylhydrolase. ABC transporters etc. in the resistant genotype in comparison to the susceptible variety.

We have quantitatively estimated the expression of LEA protein, sedoheptulose-1,7- biphosphatase (SBPase), Photosystem II type I chlorophyll a/b-binding protein and peroxisomal fatty acid beta- oxidation and observed that LEA protein and peroxisomal fatty acid  $\beta$ -oxidation multifunctional protein were at peak at 24 hrs in resistant genotype, while there was no such upregulation in the susceptible variety. SBPase and Photosystem II type I chlorophyll a/b-binding protein transcript accumulation was strong and constantly increased upto 72 hpi in the resistant genotype compared to the susceptible one. SBP is a calvin cycle enzyme and stimulates photosynthesis and growth from an early stage of development has been reported in transgenic tobacco upon overexpression [89]. SBPase was found to be differentially expressed in *Arabidopsis thaliana* upon infection with tobacco etch virus [90]. Hence, SBPase might have significant role in the resistance phenomenon in the wild peanut and needs to be further investigated.

Most of these ESTs were not identified in previous studies of *Arachis hypogaea* and *Phaeoisariopsis personata* interaction at molecular level using subtractive suppression hybridization [16], as well as ESTs libraries using microarray technique [52]. This clearly shows the sensitivity and importance of cDNA-AFLP in identifying novel genes induced in different stresses. Kumar and Kirti [19] reported up regulation of phenylpropanoid pathway genes such as phenylalanine ammonia lyase, cinnamate 4-hydroxylase, cinnamyl alcohol dehydrogenase and dirigent-like protein upon interaction between wild peanut and *P. personata*. Previous reports showed the upregulation of serine threonine protein kinase, heat shock protein, ABC transporter protein in *Phaeoisariopsis personata* and *Arachis hypogaea* interaction [16]. Similarly, Kumar and Kirti [19] reported on the expression of genes such as zinc finger protein, thaumatin like protein, methionine synthase, ATPase, nucleic acid binding protein, heat shock proteins, cysteine protease, oxygen evolving enhancer protein and a receptor kinase in the wild peanut, *Arachis diogeni* challenged with *P. personata* using the approach of DD-RT-PCR. It is interesting to note that similar genes have been identified using the cDNA-AFLP approach in the present study showing the importance of these genes in the resistance phenomenon. Hence disease resistance associated genes such as CC-NB-LRR, SGT1, cystatin, protein kinases, racGTPase activating protein, Cytochrome P450 monooxygenase, vacuolar processing enzyme, heat shock 70 kDa protein and 15-Hydroxyprostaglandin dehydrogenase, which were not reported in the previous studies could serve as novel candidate resistance genes in the development of disease resistant variety of peanut.

In order to study the proteins showing differential expression in the resistant and susceptible genotypes of peanut with response to late leaf spot pathogen, *Phaeoisariopsis personata*, we have followed a proteomic approach. We have successfully identified 16 protein spots with significant expression in wild peanut and 12 protein spots in susceptible peanut, because the importance of the proteins involve in incompatible interaction from wild peanut. Identified proteins could be divided into functional groups including photosynthesis, metabolism, secondary metabolism, signal transduction and defence related proteins (Fig. 6).

RuBisCO activase is the most abundant and important photosynthetic enzyme in  $C_3$  plants which leads to carbon fixation and photorespiration. The RuBisCO enzyme found in the chloroplast plays an important role in photosynthesis and is known to be reduced in infected plant cells because attack of pathogens lead to degradation of chloroplasts [91]. The upregulation of large subunit of rubisco (rbcL) and other photosynthesis related proteins has been reported in rice plants under stress [92,93] and a similar phenomenon has been observed both in

susceptible/resistant genotypes during plant-pathogen interaction in the present study. Wu, et al. [38] reported that Rubisco was differentially expressed in resistance and susceptible genotypes of maize infected with sugarcane mosaic virus. Several ribulose biphosphate carboxylase enzymes were found up-accumulated in wild peanut, while it was also differentially up-regulated in susceptible peanut. Photosynthesis is carried out by two light dependent part, photosystem I and photosystem II, in thylakoid membrane of chloroplasts. The chlorophyll a/b binding protein stabilizes the photosystem I and II through balanced excitation energy. In our study, we have observed an increased expression of chlorophyll a/b binding protein in susceptible peanut, which is similar to Wu, et al. [38] finding, where it was induced in susceptible maize upon virus inoculation. We have also found differential expression of chlorophyll a/b binding protein upon pathogen challenge in wild peanut. We have identified induced expression of photosystem II stability factor in both wild and susceptible peanut, indicating its possible role in disease resistance. According to Metha, et al. [94], photosystem II has emerged as a target of resistance signalling in plant-pathogen interaction. Oxygen evolving enhancer protein is another photosystem II associated protein, which is involved in the regulation of photosystem II and was differentially up-regulated upon pathogen challenge in wild peanut in proteomic study and also in cDNA-AFLP analysis. Quantitative real-time analyses validate the up-regulation of oxygen evolving enhancer protein in wild peanut, while no such up-regulation was found in the susceptible peanut plants. Recently, differentially expressed genes were identified in resistant maize genotypes upon virus infection [38]. The results indicate that the ability of photosynthesis of resistance and susceptible peanut genotype might be different due to chloroplasts of the sampled cells were affected by the infection, and photosynthetic activity was increased possibly to compensate the loss.

F-box proteins regulate diverse cellular processes, including cell cycle transition, transcriptional regulation and signal transduction by playing roles in Skp1p-cullin-F box protein (SCF) complexes. F-box proteins have also been reported to be expressed during panicle and seed developmental stage and therefore appear to be involved in regulating plant growth and development. Wang, et al. [95] have demonstrated the role of F-box protein during various stress responses like water deficit, salts, wounding, and elicitation. In our study, we have found F-box protein differentially up-regulated in wild peanut upon pathogen inoculation and quantitatively validated its up-regulation by real-time analyses in resistant as well as susceptible peanut plants.

Glyceraldehyde-3-phosphate dehydrogenase (GAPDH) is a central glycolytic protein with pivotal role in energy production. Recent studies, in animal system indicating a role of glyceraldehyde-3-phosphate dehydrogenase (GAPDH) in apoptosis or oxidative stress has been reported [96,97]. GAPDH is also involved in various diseases especially neurodegenerative disorders and cancers [98]. We have found differential up-regulation of GAPDH in wild peanut upon pathogen challenge in proteomic study as well as cDNA-AFLP analysis. Quantitative real-time analyses showed strong up-regulation of GAPDH at 72 hrs of pathogen inoculation in wild peanut, while trivial up-regulation was observed in the susceptible peanut plants. Recently, GAPDH was found up-regulated in a proteomic study during plant-virus interaction in maize genotypes with sugarcane mosaic virus [38].

In plants, ascorbic acid plays an important role in stress responses as well as growth and development and act as an antioxidant to scavenge reactive oxygen species (ROS) generated during physiological processes [99]. Ascorbic acid is also involved in defence mechanisms against pathogen attack and environmental oxidative stresses, and has been implicated in the regulation of cell division and expansion [100]. Ascorbic acid is readily oxidized to monodehydroascorbate, which dissociates to form unstable dehydroascorbate at alkaline pH. Monodehydroascorbate reductase (MDAR) and dehydroascorbate reductase (DHAR) are

known to play protective roles in plants as enzymes that maintain ascorbate in its reduced form [101,102]. Monodehydroascorbate reductase uses NAD(P)H as a reductant and maintains reduced pools of ascorbate by recycling the oxidized form of ascorbate, which serves as an important antioxidant [103]. Yoon, et al. [104] demonstrated increased mRNA expression of *Brassica campestris* monodehydroascorbate reductase in response to oxidative stress invoked by hydrogen peroxide, salicylic acid, paraquat, and ozone. In our study, monodehydroascorbate reductase was induced upon pathogen challenge in highly resistant wild peanut genotype. Therefore, we can assume that MDAR might be involved in controlling the balance amount of antioxidant in the cell during pathogen challenge, which has to be further validated for better understanding.

Plant defensins are a family of small, basic proteins that contain 4–5 disulfide bonds and known to possess potent antifungal activity. The majority of characterized plant defensins show a constitutive pattern of expression, with an induction in expression in response to pathogen attack, wounding and some abiotic stresses [105,106]. Plant defensins are best known for their antimicrobial activity against a broad spectrum of plant pathogens that include bacteria, yeast and a number of pathogenic fungi [107]. We observed induced expression of a defensin protein in wild peanut upon pathogen challenge while unable to detect in susceptible peanut. It could be one of the important reasons for resistivity of wild peanut against micro-organisms.

Sedoheptulose-1,7-biphosphatase (SBP) was found up-accumulated in the resistant genotype of peanut. SBPase is a Calvin cycle enzyme and stimulates photosynthesis and growth from an early stage of development in transgenic tobacco upon overexpression [89]. It was found to be differentially expressed in *Arabidopsis thaliana* upon infection with tobacco etch virus [90]. We have also found that proteins involved in secondary metabolism, such as Terpenoid synthase and Dihydroflavonol reductase were up-regulated along with other metabolism related proteins like glyoxalase I and malate dehydrogenase. We have observed proteins that are involved in signal transduction such as phytochrome-A and F-box protein were found differentially up-regulated in wild peanut upon pathogen challenge. Hence, these proteins through metabolism and signaling, might have significant role in the defence phenomenon in the wild peanut and needs to be further investigated.

We found several photosynthesis related proteins like Rubisco activase, Chlorophyll a/b binding protein and Ferredoxin-NADP reductase up-regulated in the susceptible peanut upon pathogen challenge. Rubisco is the abundant enzyme of plant cell and plays important role in photosynthetic carbon fixation. Wu, et al. [38] identified its up-regulation during plant-virus interaction in resistant and susceptible ecotypes of maize infected with sugarcane mosaic virus. Chlorophyll a/b binding protein provides excitation energy between photosystem I and II, which balances the photosystems [108]. Chlorophyll a/b binding protein upregulation was also reported in *Brassica juncea* and maize during plant-pathogen interaction [37,38]. Ferredoxin-NADP reductase transfers electrons between the electron carriers, ferredoxin and NADP(H) in the photosynthetic electron transport system and up-regulated upon biotic stress [38]. Phosphoglycerate kinase catalyzes the reaction of 1,3-Biphosphoglycerate and ADP to produce 3-Phosphoglycerate and ATP. This method for ATP production is known as substrate-level phosphorylation because it produces energy storing ATP molecules without the use of oxygen, NADH, or an ATPase. We have found up-regulation of two spots corresponding to phosphoglycerate kinase. Kaur, et al. [37] also observed the up-regulation of phosphoglycerate kinase in proteome analysis of *Albugo candida*-*Brassica juncea* pathosystem. Cytosolic ascorbate peroxidase possesses anti-oxidative properties and protects cellular components such as mitochondria and chloroplasts against oxidative stress. Similarly, Wu, et al. [38] observed its up-regulation during plant-virus interaction in maize with sugarcane mosaic virus. Identified

proteins were involved in stress tolerance, energy metabolism, photosynthesis and protein synthesis under stress conditions.

Taken together cDNA-AFLP as well as 2D analysis data, we observed that the oxygen-evolving enhancer protein, F-box protein, Sedoheptulose-1,7-bisphosphatase, Glyceraldehyde-3-phosphate dehydrogenase, Dihydroflavonol reductase, Phytochrome A and Photosystem-II chlorophyll a/b binding protein were up-regulated upon pathogen challenge. This is the first approach to elucidate the molecular basis of the response of the resistant genotype to the late leaf spot pathogen, and its defence mechanism. How plants regulate the photosynthetic apparatus and increases systemic pathogen resistance during defence however, remains unclear and further studies are required. Hence, these TDFs and proteins might have significant role in the resistance phenomenon in the wild peanut and need to be further characterize. Our results anticipate the cloning resistance genes for tikka disease from wild peanut *Arachis diogeni* that would facilitate generation of pathogen-resistant peanut cultivars.

## Supporting Information

**S1 Fig. *Phaeoisariopsis personata* infection and spore germination, (a) Spore infection in *Arachis hypogaea* (Susceptible) 24 dpi and spores, (b) Spore infection in *Arachis diogeni* (Resistant) 24 dpi and germinated spore 24 hrs.**

(TIF)

**S2 Fig. cDNA-AFLP gel picture: A representative picture of cDNA-AFLP gel showing differential expression of TDFs upon pathogen challenge in *Arachis diogeni*.** C- represents the pool sample of mock inoculated at 24,48,72 and 96 hrs while T- represents the pool sample of pathogen inoculated at 24,48,72 and 96 hrs. The primer combination used were; lane C<sub>1</sub>T<sub>1</sub>: M-CAG/E-AGG, C<sub>2</sub>T<sub>2</sub>: M-CAG/E-ACG, C<sub>3</sub>T<sub>3</sub>: M-CAG/E-AGC, C<sub>4</sub>T<sub>4</sub>: M-CAG/E-ACC.

Arrow indicate differentially expressed TDFs selected for further analysis.

(TIF)

**S1 Table. Primers used in quantitative real time PCR analysis.**

(DOCX)

**S2 Table. Quantitative validation of nineteen TDFs, which were differentially expressed in incompatible (Resistance = *A. diogeni*) interaction and compared with compatible (Susceptible = *A. hypogaea* L.) interaction upon *Phaeoisariopsis personata* inoculation at different time points.**

(DOCX)

**S3 Table. TDFs Submitted to GenBank.**

(DOCX)

## Acknowledgments

The authors appreciate Department of Biotechnology, Government of India for supporting this research. Thanks are also due to ICRISAT, Hyderabad, for providing the peanut wild species germplasm. The authors thank Mrs. Monika and Mrs. Kalpana, Proteomics facility of School of Life Sciences, University of Hyderabad. The authors also acknowledge the research facilities supported by DST-FIST, DBT-CREBB, UGC-SAP-CAS & XI plan for funding to the Department of Plant Sciences, University of Hyderabad.



## Author Contributions

Conceived and designed the experiments: DK PK. Performed the experiments: DK. Analyzed the data: DK PK. Contributed reagents/materials/analysis tools: DK PK. Wrote the paper: DK PK.

## References

1. Hammond-Kosack KE, Jones JDG (1997) Plant disease resistance genes. *Ann Rev Plant Physiol Plant Mol Biol.* 48: 575–607. PMID: [15012275](#)
2. Dangl JL, Jones JD (2001) Plant pathogens and integrated defence responses to infection. *Nature* 411: 826–833. PMID: [11459065](#)
3. Jones JD, Dangl JL (2006) The plant immune system. *Nature* 444: 323–329. PMID: [17108957](#)
4. Dangl JL, Dietrich RA, Rheeberg MH (1996) Death don't have no mercy: Cell death programs in plant-microbe interactions. *Plant Cell* 18: 1793–1807.
5. Sutherland MW (1991) The generation of oxygen radicals during host plant responses to infection. *Physiol Mol Plant Pathol.* 39: 79–93.
6. Osbourn AE (1999) Antimicrobial phytoprotectants and fungal pathogens: A commentary. *Fungal Genet Biol.* 26: 163–168. PMID: [10361030](#)
7. Ibeas JL, Lee H, Damsz B, Prasad DT, Pardo JM, et al. (2000) Fungal cell wall phosphomannans facilitate the toxic activity of a plant PR-5 protein. *Plant J.* 23: 375–383. PMID: [10929130](#)
8. Grichar WJ, Besler BA, Jaks AJ (1998) Peanut (*Arachis hypogaea* L.) cultivar response to leaf spot disease development under four disease management programs. *Peanut Sci.* 25: 35–39.
9. Young ND, Weeden NF, Kochert G (1996) Genome mapping in legumes (Fam. Fabaceae). In *Genome Mapping in Plants*, Paterson A. H., Ed. 211–227, Landes Bioscience Press, Austin, Tex, USA, 1996. PMID: [9007761](#)
10. Feng S, Wang X, Zhang X, Dang PM, Holbrook CC, et al. (2012) Peanut (*Arachis hypogaea*) expressed sequence tag project: progress and application. *Comparative and Functional Genomics.* Article ID 373768.
11. Zhang J, Liang S, Duan J, Wang J, Chen S, et al. (2012) De novo assembly and Characterisation of the Transcriptome during seed development, and generation of genic-SSR markers in Peanut (*Arachis hypogaea* L.). *BMC Genomics* 13: 90. doi: [10.1186/1471-2164-13-90](#) PMID: [22409576](#)
12. Guo B, Chen X, Dang P, Scully BT, Liang X, et al. (2008) Peanut gene expression profiling in developing seeds at different reproduction stages during *Aspergillus parasiticus* infection. *BMC Developmental Biology* 8: 12. doi: [10.1186/1471-213X-8-12](#) PMID: [18248674](#)
13. Wynne JC, Beute MK, Nigam SN (1991) Breeding for disease resistance in peanut (*Arachis hypogaea* L.). *Ann Rev Phytopathol.* 29: 279–303.
14. Singh A K, Mehan V K, Nigam SN (1997) Sources of resistance to groundnut fungal and Bacterial wilt diseases: an update and appraisal. *Information Bulletin* 50:48 ICRISAT, Patancheru, India.
15. Pande S, Narayana Rao J (2001) Resistance of wild *Arachis* species to late leaf spot and rust in greenhouse trials. *Plant Disease* 85: 851–855.
16. Nobile PM, Lopes CR, Barsalobres-Cavallari C, Quecini V, Coutinho LL, et al. (2008) Peanut genes identified during initial phase of *Cercosporidium personatum* infection. *Plant Sci.* 174: 78–87.
17. Guo B, Fedorova ND, Chen X, Wan CH, Wang W, et al. (2011) Gene Expression Profiling and Identification of Resistance Genes to *Aspergillus flavus* Infection in Peanut through EST and Microarray Strategies. *Toxins* 3: 737–753. doi: [10.3390/toxins3070737](#) PMID: [22069737](#)
18. Payton P, Kottapalli KR, Rowland D, Faircloth W, Guo B, et al. (2009) Gene expression profiling in peanut using high density oligonucleotide microarrays. *BMC Genomics* 10: 265. doi: [10.1186/1471-2164-10-265](#) PMID: [19523230](#)
19. Kumar KRR, Kirti PB (2011) Differential gene expression in *Arachis diogeni* upon interaction with peanut late leaf spot pathogen *Phaeoisariopsis personata* and characterization of a pathogen induced cyclophilin. *Plant Mol Biol.* 75: 497–513. doi: [10.1007/s11103-011-9747-3](#) PMID: [21298396](#)
20. Ding YF, Wang CT, Tang YY, Wang XZ, Wu Q, et al. (2012) Isolation and analysis of differentially expressed genes from peanut in response to challenge with *Ralstonia solanacearum*. *Electronic Jour Biotechnol* 15: 5.
21. Peng WF, Lv JW, Ren XP, Huang L, Zhao XY, et al. (2011) Differential expression of genes related to bacterial wilt resistance in peanut (*Arachis hypogaea* L.) *Hereditas* (Beijing) 33: 389–396. PMID: [21482530](#)

22. Vos P, Hogers R, Bleeker M, Reijans M, Vandelee T, et al. (1995) AFLP: a new concept for DNA fingerprinting. *Nucleic Acids Res* 23: 4407–4414. PMID: [7501463](#)
23. Bachem CWB, Van der Hoeven RS, De Bruijn SM, Vreugdenhil D, Zabeau M, et al. (1996) Visualization of differential gene expression using a novel method of RNA fingerprinting based on AFLP: Analysis of gene expression during potato tuber development. *Plant J.* 9: 745–753. PMID: [8653120](#)
24. Ditt RF, Nester EW, Comai L (2001) Plant gene expression response to *Agrobacterium tumefaciens*. *PNAS (USA)* 98: 10954–10959. PMID: [11535836](#)
25. Fukumura R, Takahashi H, Saito T, Tsutsumi Y, Fujimori A, et al. (2003) A sensitive transcriptome analysis method that can detect unknown transcripts. *Nucleic Acids Res.* 31: 94. PMID: [12519956](#)
26. Wang XJ, Tang CL, Zhang G, Li YC, Wang CF, et al. (2009) cDNA-AFLP analysis reveals differential gene expression in compatible interaction of wheat challenged with *Puccinia striiformis* f. sp. *tritici*. *BMC Genomics* 10: 289. doi: [10.1186/1471-2164-10-289](#) PMID: [19566949](#)
27. Wang X, Liu W, Chen X, Tang C, Dong Y, et al. (2010) Differential gene expression in incompatible interaction between wheat and stripe rust fungus revealed by cDNA-AFLP and comparison to compatible interaction. *BMC Plant Biology* 10: 9. doi: [10.1186/1471-2229-10-9](#) PMID: [20067621](#)
28. Cheng SF, Huang YP, Wu ZR, Hu CC, Hsu YH, et al. (2010) Identification of differentially expressed genes induced by Bamboo mosaic virus infection in *Nicotiana benthamiana* by cDNA-amplified fragment length polymorphism. *BMC Plant Biology* 10: 286. doi: [10.1186/1471-2229-10-286](#) PMID: [21184690](#)
29. Baisakh N, Subudhi PK, Parami NP (2006) cDNA-AFLP analysis reveals differential gene expression in response to salt stress in a halophyte *Spartina alterniflora* Loisel. *Plant Science* 170: 1141–1149.
30. Song Y, Wang Z, Bo W, Ren Y, Zhang Z, et al. (2012) Transcriptional profiling by cDNA-AFLP analysis showed differential transcript abundance in response to water stress in *Populus hopeiensis*. *BMC Genomics* 13: 286. doi: [10.1186/1471-2164-13-286](#) PMID: [22747754](#)
31. Liao JL, Zhang HY, Liu JB, Zhong PA, Huang YJ (2012) Identification of candidate genes related to rice grain weight under high-temperature stress. *Plant Sci.* 196: 32–43. doi: [10.1016/j.plantsci.2012.07.013](#) PMID: [23017897](#)
32. Wang T, Zhang E, Chen X, Li L, Liang X (2010) Identification of seed proteins associated with resistance to pre-harvested aflatoxin contamination in groundnut (*Arachis hypogaea* L). *BMC Plant Biology* 10: 267. doi: [10.1186/1471-2229-10-267](#) PMID: [21118527](#)
33. Wang Z, Yan S, Liu C, Chen F, Wang T (2012) Proteomic analysis reveals an aflatoxin-triggered immune response in cotyledons of *Arachis hypogaea* infected with *Aspergillus flavus*. *Jour Proteome Res.* 11: 2739–2753. doi: [10.1021/pr201105d](#) PMID: [22424419](#)
34. Kottapalli KR, Payton P, Rakwal R, Agrawal GK, Shibato J, et al. (2008) Proteomics analysis of mature seed of four groundnut cultivars using two-dimensional gel electrophoresis reveals distinct differential expression of storage, anti-nutritional, and allergenic proteins. *Plant Sci.* 175:321–329
35. Kottapalli KR, Randeep R, Shibato J, Burow G, Tissue D, et al. (2009) Physiology and proteomics of the water-deficit stress response in three contrasting groundnut genotypes. *Plant Cell Environ.* 32: 380–407. doi: [10.1111/j.1365-3040.2009.01933.x](#) PMID: [19143990](#)
36. Katam R, Basha SM, Suravajhala P, Pechan T (2010) Analysis of groundnut leaf proteome. *Jour Proteome Res.* 9: 2236–2254. doi: [10.1021/pr901009n](#) PMID: [20345176](#)
37. Kaur P, Jost R, Sivasithamparam K, Barbetti MJ (2011) Proteome analysis of the *Albugo candida*-*Brassica juncea* pathosystem reveals that the timing of the expression of defence-related genes is a crucial determinant of pathogenesis. *Jour Exp Bot.* 62: 1285–1298. doi: [10.1093/jxb/erq365](#) PMID: [21193577](#)
38. Wu L, Han Z, Wang S, Wang X, Sun A, et al. (2013) Comparative proteomic analysis of the plant—virus interaction in resistant and susceptible ecotypes of maize infected with sugarcane mosaic virus. *Jour Proteomics* 89: 124–140.
39. Chivasa S, Hamilton JM, Pringle RS, Ndimba BK, Simon WJ, et al. (2006) Proteomic analysis of differentially expressed proteins in fungal elicitor-treated *Arabidopsis* cell cultures. *Jour of Exp Bot.* 57: 1553–1562. PMID: [16547123](#)
40. Castillejo MA, Fernandez-Aparicio M, Rubiales D (2011) Proteomic analysis by two-dimensional differential in gel electrophoresis (2D DIGE) of the early response of *Pisum sativum* to *Orobanche crenata*. *Jour Exp Bot.* doi: [10.1093/jxb/err246](#).
41. Chang Puryear, Cairney (1993) A simple and efficient method for isolating RNA from pine trees. *Plant Mol Bio Rep.* 11: 113–116.
42. Creste S, Tulmann-Neto A, Figueira A (2001) Detection of single sequence repeat Polymorphisms in denaturing polyacrylamide sequencing gels by silver staining. *Plant Mol Biol Rep.* 19: 299–306.

43. Sarvanan RS, Rose JKC (2004) A critical evaluation of sample extraction techniques for enhanced proteomic analysis of recalcitrant plant tissues. *Proteomics* 4:2522–2532
44. Wang X, Li X, Li Y (2007) A modified Commaassie Brilliant Blue staining method at nanogram sensitivity compatible with proteomic analysis. *Biotechnol Lett* 29: 1599–1603. PMID: [17563857](#)
45. Shevchenko A, Wilm M, Vorm O, Mann M (1996) Mass spectrometric sequencing of proteins silver-stained polyacrylamide gels. *Anal Chem*. 68: 850–858. PMID: [8779443](#)
46. Brand Y, Hovav R (2010) Identification of suitable internal control Genes for quantitative real-time PCR expression analyses in peanut (*Arachis hypogaea*). *Peanut Science* 37: 12–19.
47. Livak KJ, Schmittgen TD (2001) Analysis of relative gene expression data using real-time quantitative PCR and the  $2^{-\Delta\Delta CT}$  method. *Methods* 25: 402–408. PMID: [11846609](#)
48. Abdou YAM, Gregory WC, Cooper WE (1974) Sources and nature of resistance to *Cercospora arachidicola* Hori. and *Cercosporidium personatum* (Beck. and Curt.) Deighton in *Arachis* species. *Peanut Sci.* 1: 6–11.
49. Shokes FM, Culbreath AK, Early and late leaf spots, in: Kokalis-Burelle N, Porter DM, Rodrí'guez-Ka'bana R, Smith DH, Subrahmanyam P (1997) Eds. *Compendium of Groundnut Diseases* 2nd Edition., St. Paul The American Phytopathological Society, APS Press 1: 17–20.
50. Bevan M, Bancroft I, Bent E (1998) Analysis of 1.9 Mb of contiguous sequence from Chromosome 4 of *Arabidopsis thaliana*. *Nature* 391: 485–493. PMID: [9461215](#)
51. Flor HH (1971) Current status of the gene-for-gene concept. *Annu Rev Phytopathol* 9: 275–296.
52. Luo M, Dang P, Bausher MG, Holbrook CC, Lee RD, et al. (2005) Identification of transcripts involved in resistance responses to leaf spot disease caused by *Cercosporidium personatum* in peanut (*Arachis hypogaea*). *Phytopathol* 95:381–387.
53. Rao NK, Reddy LJ, Bramel PJ (2003) Potential of wild species for genetic enhancement of some semi-arid food crops. *Genet Resour Crop Evol.* 50: 707–721.
54. Polesani M, Desario F, Ferrarini A, Zamboni A, Pezzotti M, et al. (2008) cDNA-AFLP analysis of plant and pathogen genes expressed in grapevine infected with *Plasmopara viticola*. *BMC Genomics* 9: 142. doi: [10.1186/1471-2164-9-142](#) PMID: [18366764](#)
55. Sestili S, Polverari A, Luongo L, Ferrarini A, Scotton M, et al. (2011) Distinct colonization patterns and cDNA-AFLP transcriptome profiles in compatible and incompatible interactions between melon and different races of *Fusarium oxysporum* f. sp. *Melonis*. *BMC Genomics* 12:122. doi: [10.1186/1471-2164-12-122](#) PMID: [21338485](#)
56. Jones JT, Harrower BE (1998) A comparison of the efficiency of differential display and cDNA-AFLPs as tools for the isolation of differentially expressed parasite genes. *Fundamental App Nematol.* 21:81–88.
57. Kuhn E (2001) From library screening to microarray technology: strategies to determine gene expression profiles and to identify differentially regulated genes in plants. *Ann Bot.* 87: 139–155.
58. Xu H, Reddy ASN (1997) Cloning and expression of a PR5-like protein from *Arabidopsis*: inhibition of fungal growth by bacterially expressed protein. *Plant Mol Biol.* 34: 949–959. PMID: [9290646](#)
59. Chan YW, Tung WL, Friffith M, Chow KC (1999) Cloning of a cDNA encoding the thaumatin-like protein of winter rye (*Secale cereale* L. Musketeer) and its functional characterization. *Jour Exp Bot.* 50: 1627–1628.
60. Datta K, Velazhahan R, Oliva N, Ona I, Mew T, et al. (1999) Over-expression of the cloned rice thaumatin-like protein (PR-5) gene in transgenic rice plants enhances environmental friendly resistance to *Rhizoctonia solani* causing sheath blight disease. *Theor Appl Genet.* 98: 1138–1145.
61. Zhu B, Chen THH, Li PH (1996) Analysis of late blight disease resistance and freezing tolerance in transgenic potato plants expressing sense and antisense genes for an osmotin-like protein. *Planta* 198: 70–77. PMID: [8580772](#)
62. Munis MFH, Tu L, Deng F, Tan J, Xu L, et al. (2010) A thaumatin-like protein gene involved in cotton fiber secondary cell wall development enhances resistance against *Verticillium dahliae* and other stresses in transgenic tobacco. *Biochem Biophys Res Comm.* 393: 38–44. doi: [10.1016/j.bbrc.2010.01.069](#) PMID: [20097164](#)
63. Rodriguez SV, Cedro-Tanda A, Aguilar-Hernandez V, Cortes-Onofre E, Blanco-Labra A, et al. (2010) Recombinant amaranth cystatin (AhCPI) inhibits the growth of phytopathogenic fungi. *Plant Physiol Biochem.* 48: 469–475. doi: [10.1016/j.plaphy.2010.03.012](#) PMID: [20403704](#)
64. Bangrak P, Chotigeat W (2011) Molecular cloning and biochemical characterization of a novel cystatin from Hevea rubber latex. *Plant Physiol Biochem* 49: 244–250. doi: [10.1016/j.plaphy.2010.12.007](#) PMID: [21247772](#)

65. Gao H, Narayanan NN, Ellison L, Bhattacharyya MK (2005) Two classes of highly similar coiled coil-nucleotide binding-leucine rich repeat genes isolated from the Rps1-k locus encode *Phytophthora* resistance in soybean. *Mol Plant Microbe Interact* 18: 1035–1045. PMID: [16255242](#)
66. Köhler A, Rinaldi C, Duplessis S, Bauchner M, Geelen D, et al. (2008) Genome-wide identification of NBS resistance genes in *Populus trichocarpa*. *Plant Mol Biol*. 66: 619–636. doi: [10.1007/s11103-008-9293-9](#) PMID: [18247136](#)
67. Bulgarelli D, Biselli C, Collins NC, Consonni G, Stanca AM, et al (2010) The CC-NB-LRR- Type Rdg2a resistance gene confers immunity to the seed-borne barley leaf stripe pathogen in the absence of hypersensitive cell death. *PLoS ONE* 5(9): 12599. doi: [10.1371/journal.pone.0012599](#).
68. Xing T, Higgins VJ, Blumwald E (1997) Race-specific elicitors of *Cladosporium fulvum* promote translocation of cytosolic components of NADPH oxidase to the plasma membrane of tomato cells. *Plant Cell* 9: 249–259. PMID: [9061955](#)
69. Lherminier J, Elmayan T, Fromentin J, Elaraqui KT, Vesa S, et al. (2009) NADPH oxidase-mediated reactive oxygen species production: Subcellular localization and reassessment of its role in plant defence. *Mol Plant Microbe Interact* 22: 868–881. doi: [10.1094/MPMI-22-7-0868](#) PMID: [19522569](#)
70. Wolf I, O’Kelly J, Rubinek T, Tong M, Nguyen A, et al. (2006) 15-hydroxyprostaglandin dehydrogenase is a tumor suppressor of human breast cancer. *Cancer Res*. 66: 7818–7823. PMID: [16885386](#)
71. Babiychuk E, Kushnir S, Belles-Boix E, Montagu MV, Inze D (1995) *Arabidopsis thaliana* NADPH Oxidoreductase homologs confer tolerance of yeasts toward the thiol-oxidizing Drug Diamide. *Jour Biol Chem* 270: 26224–26231. PMID: [7592828](#)
72. Romeis T (2001) Protein kinases in the plant defence response. *Curr Opin Plant Biol* 4: 407–414. PMID: [11597498](#)
73. Vinagre F, Vargas C, Schwarcz K, Cavalcante J, Nogueira EM, et al. (2006) SHR5: a novel plant receptor kinase involved in plant–N<sub>2</sub>-fixing endophytic bacteria association. *Jour Exp Bot*. 57: 559–569. PMID: [16397001](#)
74. Swidzinski JA, Sweetlove LJ, Leaver CJ (2002) A custom microarray analysis of gene expression during programmed cell death in *Arabidopsis thaliana*. *Plant J*. 30: 431–446. PMID: [12028573](#)
75. Okamoto T, Minamikawa T (1999) Molecular cloning and characterization of *Vigna mungo* processing enzyme 1 (VmPE-1), an asparaginyl endopeptidase possibly involved in post translational processing of a vacuolar cysteine endopeptidase (SH-EP). *Plant Mol Biol*. 39: 63–73. PMID: [10080709](#)
76. Rojo E, Martin R, Carter C, Zouhar J, Pan S, et al. (2004) VPEy exhibits a caspase-like activity that contributes to defence against pathogens. *Curr Biol*. 14: 1897–1906. PMID: [15530390](#)
77. Hatsugai N, Kuroyanagi M, Yamada K, Meshi T, Tsuda S, et al. (2004) A plant vacuolar protease, VPE, mediates virus-induced Hypersensitive cell death. *Science* 305: 855–858. PMID: [15297671](#)
78. Kuroyanagi M, Yamada K, Hatsugai N, Kondo M, Nishimura M, et al. (2005) Vacuolar processing enzyme is essential for mycotoxin-induced cell death in *Arabidopsis thaliana*. *Jour Biol Chem*. 280: 32914–32920. PMID: [16043487](#)
79. Martinez DE, Bartoli CG, Grbic V, Guimet JJ (2007) Vacuolar cysteine proteases of wheat (*Triticum aestivum* L.) are common to leaf senescence induced by different factors. *Jour Exp Bot*. 58: 1099–1107. PMID: [17218544](#)
80. Feller U (2004) Proteolysis, in: *Plant Cell Death Processes*. Elsevier Inc. 107–123.
81. Noel LD, Cagna G, Stuttmann J, Wirthmuller L, Betsuyaku S, et al. (2007) Interaction between SGT1 and cytosolic/nuclear HSC70 chaperones regulates *Arabidopsis* immune responses. *Plant Cell* 19: 4061–4076. PMID: [18065690](#)
82. Lee YT, Jacob J, Michowski W, Nowotny M, Kuznicki J, et al. (2004) Human Sgt1 binds HSP90 through the CHORD-Sgt1 domain and not the tetratricopeptide repeat domain. *Jour Biol Chem*. 279:16511–16517. PMID: [14761955](#)
83. Boter M, Amigues B, Peart J, Breuer C, Kadota Y, et al. (2007) Structural and functional analysis of SGT1 reveals that its interaction with HSP90 is required for the accumulation of Rx, an R protein involved in plant immunity. *Plant Cell* 19: 3791–3804. PMID: [18032631](#)
84. Azevedo C, Sadanandom A, Kitagawa K, Freialdenhoven A, Shirasu K, et al. (2002) The RAR1 interactor SGT1, an essential component of R gene-triggered disease resistance. *Science* 295: 2073–2076. PMID: [11847307](#)
85. Austin MJ, Muskett P, Kahn K, Feys BJ, Jones JD, et al. (2002) Regulatory role of SGT1 in early R gene mediated plant defences. *Science* 295: 2077–2080. PMID: [11847308](#)
86. Muskett PR, Kahn K, Austin MJ, Moisan LJ, Sadanandom A, et al. (2002) *Arabidopsis* RAR1 exerts rate-limiting control of R gene-mediated defences against multiple pathogens. *Plant Cell* 14: 979–992. PMID: [12034891](#)

87. Kawasaki T, Henmi K, Ono E, Hatakeyama S, Iwano M, et al. (1999) The Small GTP-binding protein Rac is a regulator of cell death in plants. *Proc Natl Acad Sci. (USA)* 96: 10922–10926. PMID: [10485927](#)
88. Ono E, Wong HL, Kawasaki T, Hasegawa M, Kodama O, et al. (2001) Essential role of the small GTPase Rac in disease resistance of rice. *Proc Natl Acad Sci. (USA)* 98: 759–764. PMID: [11149940](#)
89. Lefebvre S, Lawson T, Fryer M, Zakhleniuk OV, Lloyd JC, et al. (2005) Increased sedoheptulose-1, 7-bisphosphatase activity in transgenic tobacco plants photosynthesis and growth from an early stage in development. *Plant Physiol.* 138: 451–460. PMID: [15863701](#)
90. Agudelo-Romero P, Carbonell P, Iglesia FD, Carrera J, Rodrigo G, et al. (2008) Changes in the gene expression profile of *Arabidopsis thaliana* after infection with *Tobacco etch virus*. *Virology Jour.* 5: 92. doi: [10.1186/1743-422X-5-92](#) PMID: [18684336](#)
91. Agrios GN (1997) *Plant Pathology*: Academic Press, San Diego.
92. Mahmood T, Jan A, Jan A, Kakishima M, Komatsu S (2006) Proteomic analysis of bacterial-blight defence-responsive proteins in rice leaf blades. *Proteomics* 6: 6053–6065. PMID: [17051650](#)
93. Yu CL, Yan SP, Wang CC, Hu HT, Sun WN, et al. (2008) Pathogenesis-related proteins in somatic hybrid rice induced by bacterial blight. *Phytochemistry* 69: 1989–1996. doi: [10.1016/j.phytochem.2008.04.006](#) PMID: [18534637](#)
94. Metha A, Brasileiro ACM, Souza DSL, Romano E, Campos MA, et al. (2008) Plant–pathogen interactions: what is proteomics telling us? *FEBS J.* 275: 3731–3746. doi: [10.1111/j.1742-4658.2008.06528.x](#) PMID: [18616468](#)
95. Wang L, Dong L, Zhang Y, Wu W, Deng X, et al. (2004) Genome-wide analysis of S-locus F-box-like genes in *Arabidopsis thaliana*. *Plant Mol Biol.* 56: 929–945. PMID: [15821991](#)
96. Ishitani R, Tanaka M, Sunaga K, Katsube N, Chuang DM (1998) Nuclear localization of overexpressed glyceraldehyde-3-phosphate dehydrogenase in cultured cerebellar neurones undergoing apoptosis. *Mol Pharmacol.* 53: 701–707. PMID: [9547361](#)
97. Dastoor Z, Dreyer JL (2000) Nuclear translocation and aggregate formation of heat shock cognate protein 70 (Hsc70) in oxidative stress and apoptosis. *Jour Cell Sci.* 113: 2845–2854.
98. Tristan C, Shahani N, Sedlak TW, Sawa A (2011) The diverse functions of GAPDH: Views from different subcellular compartments. *Cellular Signalling* 23: 317–332. doi: [10.1016/j.cellsig.2010.08.003](#) PMID: [20727968](#)
99. Conklin PL (2001) Recent advances in the role and biosynthesis of ascorbic acid in plants. *Plant Cell Environ* 24: 383–394.
100. Smirnoff N (1996) The function and metabolism of ascorbic acid in plants. *Ann Bot.* 78: 661–669.
101. Eltayeb AE, Kawano N, Badawi GH, Kaminaka H, Sanekata T, et al. (2006) Enhanced tolerance to ozone and drought stresses in transgenic tobacco overexpressing dehydroascorbate reductase in cytosol. *Physiol Plant* 127: 57–65.
102. Stevens R, Page D, Gouble B, Garchery C, Zamir D, et al. (2008) Tomato fruit ascorbic acid content is linked with monodehydroascorbate reductase activity and tolerance to chilling stress. *Plant Cell Environ* 31: 1086–1096. doi: [10.1111/j.1365-3040.2008.01824.x](#) PMID: [18433441](#)
103. Noctor G, Foyer CH (1998) Ascorbate and glutathione: keeping active oxygen under control. *Annu Rev Plant Physiol Plant Mol Biol.* 49: 249–279. PMID: [15012235](#)
104. Yoon HS, Lee H, Lee IA, Kim KY, Jo J (2004) Molecular cloning of the monodehydroascorbate reductase gene from *Brassica campestris* and analysis of its mRNA level in response to oxidative stress. *Biochim Biophys Acta* 165: 181–186.
105. Bahramnejad B, Erickson LR, Atnaseo C, Goodwin PH (2009) Differential expression of eight defensin genes of *N. benthamiana* following biotic stress, wounding, ethylene, and benzothiadiazole treatments. *Plant Cell Rep.* 28: 703–717. doi: [10.1007/s00299-009-0672-8](#) PMID: [19214516](#)
106. Padovan L, Segat L, Tossi A, Calsa T, Ederson AK, et al. (2010) Characterization of a new defensin from cowpea (*Vigna unguiculata* (L.) Walp.). *Protein Pept Lett.* 17: 297–304. PMID: [20236084](#)
107. Weerden NLVD, Anderson MA (2013) Plant defensins: Common fold, multiple functions. *Fungal Biol Rev.* 26: 121–131.
108. Kundu S, Chakraborty D, Pal A (2011) Proteomic analysis of salicylic acid induced resistance to Mungbean Yellow Mosaic India Virus in *Vigna mungo*. *Jour. Proteomics* 74: 337–349.
